# Supplementary material for: Changes in The Liver Transcriptome and Physiological Parameters of Japanese Black Steers During The Fattening Period
Source: Research Square preprint supplement (doi:10.21203/rs.3.rs-882318/v1), 2021-09-15
Supplement: Supplementary file 5 [file 8443cf770d8a7854b53ea1c2.xlsx]

## Sheet: STable 1. Blood amino acid 
Supplementary Table S1
Variable	Period			P-value
	T1	T2	T3
Amino acid (nmol/ml)
Taurine	36.49±2.2b	78.41±2.3a	35.51±0.97b	<0.01
Urea	5077.84±219.46a	5388.58±171.11a	3493.36±149.8b	<0.01
Aspartic acid	7.59±0.21	8.05±0.34	7.97±0.21	0.35
Threonine	73.8±2.46a	62.01±2.73b	64.2±2.1b	<0.01
Serine	81.24±2.54	88.11±3.05	82.43±2.35	0.1583
Glutamic acid	69.19±2.11ab	63.4±1.51b	74.41±2.54a	<0.01
Glutamine	273.47±6.7c	301.66±6.61b	324.99±6.5a	<0.01
α-Amino adipic acid	15.58±1.17b	18.12±0.98a	13.24±0.6b	<0.01
Glycine	237.36±6.18a	191.46±5.15c	214.54±5.14b	<0.01
Alanine	286.06±14.88a	192.73±7.59b	207.26±7.36b	<0.01
Citrulline	65.51±1.62	59.81±2.03	61.88±1.71	0.0835
α-Aminobutyric acid	21.28±1.17a	13.71±0.65b	8.18±0.48c	<0.01
Valine	269.44±9.38a	262.3±9.21a	228.04±8.4b	<0.01
Methionine	34.52±1.05a	30.7±1b	27.92±0.58b	<0.01
Cysteine	3.8±0.17b	3.67±0.13b	4.77±0.17a	<0.01
Isoleucine	128.57±3.2a	110.46±4.36b	98.97±3.48b	<0.01
Leucine	153.45±4.87	153.65±6.81	135.79±5.59	0.0517
Tyrosine	66.44±1.6c	60.11±2.03b	53.14±1.63a	<0.01
Phenylalanine	63.33±1.73	65.65±1.95	63.48±1.3	0.5583
NH3	171.14±13.23a	135.66±2.21b	179.68±2.17a	<0.01
Ornithine	58.6±2b	71.2±2.55a	54.69±1.63b	<0.01
1-methylhistidine	4.93±0.26b	6.8±0.27a	7.11±0.27a	<0.01
Histidine	50.86±1.46	50.95±1.28	51.76±0.91	0.8504
3-methylhistidine	6.49±0.23b	8.28±0.34a	8.75±0.4a	<0.01
Lysine	114.4±4.14ab	116.87±4.06a	104.02±2.98b	0.0445
Tryptophan	39.76±1.13b	47.6±1.27a	49.1±1.22a	<0.01
Arginine	92.37±2.53a	78.14±1.94b	81.37±2b	<0.01
Hydroxyproline	47.87±1.39a	37.45±2.11b	35.43±1.16b	<0.01
Proline	81.32±2.63a	85.43±3.05a	54.45±2.5b	<0.01
