# Supplementary material for: Changes in The Liver Transcriptome and Physiological Parameters of Japanese Black Steers During The Fattening Period
Source: Research Square preprint supplement (doi:10.21203/rs.3.rs-882318/v1), 2021-09-15
Supplement: Supplementary file 7 [file 9dbc5d0903509ee40de7b80e.xlsx]

## Sheet: Stable 9. KEGG pathway
Supplementary Table S9
Pathway	Term ID	No.of DEGs	P-value	Upregulated gene	Downregulated gene
Metabolic pathways	bta01100	41	0.0002	TPH1, ACSS2, PANK1, XYLT1, HMGCR, HSD17B7, SELENOI, GALNT10, SMPD3, MAN2A1, RDH11, MAN1A2, IDS, PGM2, EXTL3, ST3GAL1, MCCC2, PDHA1, CERS6, PCYT1A, HMGCS1, ACSL1, AGL, GPT2, GLCE, GFPT1, MBOAT2, DHCR24, B3GALT5, ALDH6A1, HAL, GPAM, ACOX1, FASN, ETNK1, PNPLA3, DHCR7, LPIN1, PLCB1, LPIN2	AKR1B10
Glycerolipid metabolism	bta00561	8	0.0002	GPAM, PNPLA3, MBOAT2, LPIN1, GLA, LPIN2	AKR1B10
Bile secretion	bta04976	8	0.0002	SCARB1, ADCY9, SLCO1A2, HMGCR, ADCY1, SLC5A1, ABCB11, SLC4A4
Pancreatic secretion	bta04972	8	0.0020	ADCY9, GNAQ, KCNMA1, ATP2A2, ADCY1, PLCB1, SLC4A4	ATP2A1
Glycerophospholipid metabolism	bta00564	8	0.0021	LPGAT1, PCYT1A, GPAM, ETNK1, MBOAT2, LPIN1, LPIN2, SELENOI
AMPK signaling pathway	bta04152	8	0.0068	PDPK1, SCD, FASN, HNF4A, INSR, LEPR, HMGCR, FOXO3
cGMP-PKG signaling pathway	bta04022	8	0.0281	ADCY9, GNAQ, INSR, KCNMA1, ATP2A2, ADCY1, PLCB1	ATP2A1
Calcium signaling pathway	bta04020	8	0.0614	ADCY9, GNAQ, ATP2A2, ADCY1, PLCB1, EGFR	TNNC1, ATP2A1
Biosynthesis of antibiotics	bta01130	8	0.0880	PDHA1, ACSS2, HMGCS1, GFPT1, PGM2, HMGCR, HSD17B7, PCYOX1
Fatty acid metabolism	bta01212	6	0.0018	FADS2, ACSL1, SCD, ACOX1, FASN, FADS1
PPAR signaling pathway	bta03320	6	0.0094	FADS2, ACSL1, PDPK1, SCD, ACOX1	FABP4
Dilated cardiomyopathy	bta05414	6	0.0214	ADCY9, ITGA1, DAG1, ITGAV, ADCY1	TNNC1
Estrogen signaling pathway	bta04915	6	0.0351	GABBR2, ADCY9, GNAQ, ADCY1, PLCB1, EGFR
Melanogenesis	bta04916	6	0.0365	ADCY9, FZD5, GNAQ, MITF, ADCY1, PLCB1
Vascular smooth muscle contraction	bta04270	6	0.0698	ADCY9, GNAQ, KCNMA1, ADCY1, PLCB1	MYL6B
Ovarian steroidogenesis	bta04913	5	0.0135	SCARB1, ADCY9, INSR, ADCY1, HSD17B7
Thyroid hormone synthesis	bta04918	5	0.0388	ADCY9, PAX8, GNAQ, ADCY1, PLCB1
Aldosterone synthesis and secretion	bta04925	5	0.0586	SCARB1, ADCY9, GNAQ, ADCY1, PLCB1
Insulin secretion	bta04911	5	0.0654	ADCY9, GNAQ, KCNMA1, ADCY1, PLCB1
Salivary secretion	bta04970	5	0.0678	ADCY9, GNAQ, KCNMA1, ADCY1, PLCB1
GnRH signaling pathway	bta04912	5	0.0752	ADCY9, GNAQ, ADCY1, PLCB1, EGFR
Gap junction	bta04540	5	0.0829	ADCY9, GNAQ, ADCY1, PLCB1, EGFR
Glycosphingolipid biosynthesis - globo series	bta00603	4	0.0035	B3GALT5, GLA, ST3GAL1
Biosynthesis of unsaturated fatty acids	bta01040	4	0.0095	FADS2, SCD, ACOX1, FADS1
Galactose metabolism	bta00052	4	0.0192	PGM2, GLA	AKR1B10
Sphingolipid metabolism	bta00600	4	0.0620	SMPD3, CERS6, GLA
Regulation of lipolysis in adipocytes	bta04923	4	0.0816	ADCY9, FABP4, INSR, ADCY1
Steroid biosynthesis	bta00100	3	0.0522	DHCR24, DHCR7, HSD17B7
Terpenoid backbone biosynthesis	bta00900	3	0.0619	HMGCS1, HMGCR, PCYOX1
Glycosaminoglycan biosynthesis - heparan sulfate / heparin	bta00534	3	0.0723	GLCE, XYLT1, EXTL3
