# Supplementary material for: Changes in The Liver Transcriptome and Physiological Parameters of Japanese Black Steers During The Fattening Period
Source: Research Square preprint supplement (doi:10.21203/rs.3.rs-882318/v1), 2021-09-15
Supplement: Supplementary file 10 [file 062fd538bca6e3f1c784b752.xlsx]

## Sheet: Stable 7. T1 vs T3 DEGs list
Supplementary Table S7
Gene type	Gene ensembl ID	Gene symbol	Description	BaseMean	log2FoldChange	Style	P-value	Padj
mRNA	ENSBTAG00000048608	5_8S_rRNA	5_8S_ribosome RNA	608.215	-1.73603	Down	<0.0001	<0.0001
mRNA	ENSBTAG00000020661	ABCA1	ATP binding cassette subfamily A member 1	3359.42	2.02333	Up	<0.0001	0.0001
mRNA	ENSBTAG00000026885	ABCB11	ATP binding cassette subfamily B member 11	4954.72	2.08281	Up	<0.0001	<0.0001
mRNA	ENSBTAG00000019954	ABHD2	abhydrolase domain containing 2	926.628	1.85077	Up	<0.0001	<0.0001
mRNA	ENSBTAG00000003378	ACAP2	ArfGAP with coiled-coil, ankyrin repeat and PH domains 2	43.7899	1.56318	Up	0.0007	0.0023
mRNA	ENSBTAG00000030174	ACOX1	acyl-CoA oxidase 1	6499.72	1.95086	Up	<0.0001	<0.0001
mRNA	ENSBTAG00000011634	ACP3	acid Phosphatase 3	194.621	1.69003	Up	<0.0001	<0.0001
mRNA	ENSBTAG00000004344	ACSL1	acyl-CoA synthetase long-chain family member 1	6305.55	1.86313	Up	<0.0001	<0.0001
mRNA	ENSBTAG00000013303	ACSS2	acyl-CoA synthetase short-chain family member 2	3813.97	2.25823	Up	<0.0001	<0.0001
mRNA	ENSBTAG00000009520	ADCY1	adenylate cyclase 1	192.273	1.94574	Up	<0.0001	<0.0001
mRNA	ENSBTAG00000016629	ADCY9	adenylate cyclase 9	248.423	1.55446	Up	<0.0001	<0.0001
mRNA	ENSBTAG00000020707	ADGRG6	adhesion G protein-coupled receptor G6	511.602	1.57154	Up	0.0004	0.0016
mRNA	ENSBTAG00000009482	AFF4	AF4/FMR2 family member 4	611.612	1.61678	Up	<0.0001	<0.0001
mRNA	ENSBTAG00000016504	AGAP1	ArfGAP with GTPase domain, ankyrin repeat and PH domain 1	361.684	1.52373	Up	<0.0001	<0.0001
mRNA	ENSBTAG00000006491	AGL	amylo-alpha-1, 6-glucosidase, 4-alpha-glucanotransferase	1288.23	2.39057	Up	<0.0001	<0.0001
mRNA	ENSBTAG00000052140	AIF1L	allograft inflammatory factor 1 like	3406.03	1.65909	Up	<0.0001	<0.0001
mRNA	ENSBTAG00000001582	AKR1B10	aldo-keto reductase family 1 member B10	581.309	-1.65539	Down	<0.0001	<0.0001
mRNA	ENSBTAG00000018469	ALDH6A1	aldehyde dehydrogenase 6 family member A1	11779.2	1.64345	Up	<0.0001	<0.0001
mRNA	ENSBTAG00000019454	ANGEL1	angel homolog 1	447.164	1.68267	Up	<0.0001	<0.0001
mRNA	ENSBTAG00000031696	ANKRD44	ankyrin repeat domain 44	267.742	1.53756	Up	0.0011	0.0036
mRNA	ENSBTAG00000001117	ANKRD50	ankyrin repeat domain 50	233.227	1.57053	Up	<0.0001	<0.0001
mRNA	ENSBTAG00000011762	ANKRD52	ankyrin repeat domain 52	225.242	1.81081	Up	<0.0001	<0.0001
mRNA	ENSBTAG00000002902	ANO6	anoctamin 6	591.024	2.16512	Up	<0.0001	<0.0001
mRNA	ENSBTAG00000016911	ARHGAP23	Rho GTPase activating protein 23	109.026	1.50576	Up	<0.0001	<0.0001
mRNA	ENSBTAG00000043964	ARL5B	ADP ribosylation factor like GTPase 5B	36.4718	2.39031	Up	<0.0001	0.0001
mRNA	ENSBTAG00000018805	ASB13	ankyrin repeat and SOCS box containing 13	401.009	1.56019	Up	<0.0001	<0.0001
mRNA	ENSBTAG00000005227	ATF6	activating transcription factor 6	717.578	2.63297	Up	<0.0001	<0.0001
mRNA	ENSBTAG00000000446	ATP11A	ATPase phospholipid transporting 11A	1385.36	1.69582	Up	<0.0001	<0.0001
mRNA	ENSBTAG00000000290	ATP11B	ATPase, class VI, type 11B	629.616	1.5639	Up	<0.0001	<0.0001
mRNA	ENSBTAG00000013204	ATP13A3	ATPase 13A3	1601.54	1.91323	Up	0.0005	0.0017
mRNA	ENSBTAG00000006541	ATP2A1	ATPase sarcoplasmic/endoplasmic reticulum Ca2+ transporting 1	33.8178	-2.02209	Down	0.0088	0.0218
mRNA	ENSBTAG00000001398	ATP2A2	ATPase sarcoplasmic/endoplasmic reticulum Ca2+ transporting 2	1953.42	1.8494	Up	<0.0001	<0.0001
mRNA	ENSBTAG00000010018	ATP7A	ATPase copper transporting alpha	350.74	1.59767	Up	0.0025	0.0073
mRNA	ENSBTAG00000010353	ATP7B	ATPase copper transporting beta	2731.62	1.76283	Up	<0.0001	<0.0001
mRNA	ENSBTAG00000003848	ATRN	attractin	1776.06	1.85403	Up	<0.0001	<0.0001
mRNA	ENSBTAG00000023407	B3GALT5	beta-1,3-galactosyltransferase 5	47.9104	1.76245	Up	<0.0001	<0.0001
mRNA	ENSBTAG00000020713	BACH2	BTB domain and CNC homolog 2	40.0436	1.58113	Up	<0.0001	0.0002
mRNA	ENSBTAG00000010694	BICC1	BicC family RNA binding protein 1	166.62	2.38149	Up	<0.0001	<0.0001
mRNA	ENSBTAG00000002495	BRD4	bromodomain containing 4	736.331	1.57987	Up	<0.0001	<0.0001
mRNA	ENSBTAG00000011581	BSN	bassoon presynaptic cytomatrix protein	156.118	1.52962	Up	<0.0001	<0.0001
mRNA	ENSBTAG00000006817	CBL	Cbl proto-oncogene	86.8248	1.97477	Up	0.0001	0.0003
mRNA	ENSBTAG00000003393	CCDC157	coiled-coil domain containing 157	297.044	-2.53761	Down	<0.0001	<0.0001
mRNA	ENSBTAG00000019734	CD276	CD276 molecule	355.313	1.55904	Up	<0.0001	<0.0001
mRNA	ENSBTAG00000012992	CDH6	cadherin 6	67.1373	-2.47856	Down	<0.0001	<0.0001
mRNA	ENSBTAG00000044179	CERS6	ceramide synthase 6	930.033	2.23586	Up	<0.0001	<0.0001
mRNA	ENSBTAG00000004432	CHRDL1	chordin like 1	123.116	1.51501	Up	<0.0001	<0.0001
mRNA	ENSBTAG00000021487	CIART	circadian associated repressor of transcription	37.4129	-1.5895	Down	<0.0001	0.0002
mRNA	ENSBTAG00000011913	CKAP4	cytoskeleton associated protein 4	745.48	1.58375	Up	<0.0001	<0.0001
mRNA	ENSBTAG00000001507	CLCN5	chloride voltage-gated channel 5	31.0224	2.91944	Up	<0.0001	<0.0001
mRNA	ENSBTAG00000013148	CLDN1	claudin 1	863.8	2.53927	Up	<0.0001	<0.0001
mRNA	ENSBTAG00000044044	CLOCK	clock circadian regulator	154.037	1.64027	Up	0.0001	0.0004
mRNA	ENSBTAG00000011823	CLSTN1	calsyntenin 1	2589.95	1.80225	Up	<0.0001	<0.0001
mRNA	ENSBTAG00000019213	CNNM4	cyclin and CBS domain divalent metal cation transport mediator 4	152.104	1.62267	Up	<0.0001	<0.0001
mRNA	ENSBTAG00000035836	COLGALT2	collagen beta	260.204	1.52992	Up	<0.0001	<0.0001
mRNA	ENSBTAG00000012371	CPD	carboxypeptidase D	1479.5	2.30922	Up	<0.0001	<0.0001
mRNA	ENSBTAG00000009020	CRIM1	cysteine rich transmembrane BMP regulator 1	894.164	1.60869	Up	<0.0001	<0.0001
mRNA	ENSBTAG00000011580	DAG1	dystroglycan 1	1369.79	1.78929	Up	<0.0001	<0.0001
mRNA	ENSBTAG00000020315	DENND5B	DENN domain containing 5B	201.22	1.74878	Up	<0.0001	<0.0001
mRNA	ENSBTAG00000015341	DEPTOR	DEP domain containing MTOR-interacting protein	125.626	2.51745	Up	<0.0001	<0.0001
mRNA	ENSBTAG00000004688	DHCR24	24-dehydrocholesterol reductase	16534.1	2.59236	Up	<0.0001	<0.0001
mRNA	ENSBTAG00000016465	DHCR7	7-dehydrocholesterol reductase	2681.17	2.49701	Up	<0.0001	<0.0001
mRNA	ENSBTAG00000006531	DIP2C	disco interacting protein 2 homolog C	630.872	2.08589	Up	<0.0001	<0.0001
mRNA	ENSBTAG00000015165	DPY19L3	dpy-19 like 3	193.45	1.96983	Up	<0.0001	0.0001
mRNA	ENSBTAG00000015106	DSP	desmoplakin	2985.56	1.79422	Up	<0.0001	<0.0001
mRNA	ENSBTAG00000010763	DUSP16	dual specificity phosphatase 16	769.947	1.87325	Up	<0.0001	<0.0001
mRNA	ENSBTAG00000012904	EDEM1	ER degradation enhancing alpha-mannosidase like protein 1	2178.86	1.93821	Up	<0.0001	<0.0001
mRNA	ENSBTAG00000011628	EGFR	epidermal growth factor receptor	1561.89	1.87588	Up	<0.0001	<0.0001
mRNA	ENSBTAG00000011950	EMC1	ER membrane protein complex subunit 1	1002.68	1.648	Up	<0.0001	<0.0001
mRNA	ENSBTAG00000013658	ERC1	ELKS/RAB6-interacting/CAST family member 1	988.083	1.76371	Up	<0.0001	<0.0001
mRNA	ENSBTAG00000016799	ERN1	endoplasmic Reticulum To Nucleus Signaling 1	389.282	1.73658	Up	<0.0001	<0.0001
mRNA	ENSBTAG00000005833	ETNK1	ethanolamine kinase 1	684.021	1.53219	Up	<0.0001	<0.0001
mRNA	ENSBTAG00000010052	EXD2	exonuclease 3'-5' domain containing 2	48.9281	1.68626	Up	0.0002	0.0007
mRNA	ENSBTAG00000014112	EXOC4	exocyst complex component 4	557.883	1.60224	Up	<0.0001	<0.0001
mRNA	ENSBTAG00000008844	EXTL3	exostosin like glycosyltransferase 3	430.425	1.79364	Up	<0.0001	<0.0001
mRNA	ENSBTAG00000011298	EYA1	EYA transcriptional coactivator and phosphatase 1	95.9318	-3.86331	Down	<0.0001	<0.0001
mRNA	ENSBTAG00000004003	F9	coagulation factor IX	13636.8	1.92875	Up	<0.0001	<0.0001
mRNA	ENSBTAG00000037526	FABP4	fatty acid binding protein 4, adipocyte	46.8566	-3.19877	Down	0.0001	0.0005
mRNA	ENSBTAG00000022294	FADS1	fatty acid desaturase 1	729.864	2.48049	Up	<0.0001	<0.0001
mRNA	ENSBTAG00000015505	FADS2	fatty acid desaturase 2	43691.4	2.55152	Up	<0.0001	<0.0001
mRNA	ENSBTAG00000016497	FAM168A	family with sequence similarity 168 member A	136.575	1.72942	Up	<0.0001	<0.0001
mRNA	ENSBTAG00000013999	FAM20B	FAM20B, glycosaminoglycan xylosylkinase	220.827	1.53736	Up	<0.0001	<0.0001
mRNA	ENSBTAG00000005025	FAM91A1	family with sequence similarity 91 member A1	1239.6	2.00863	Up	<0.0001	<0.0001
mRNA	ENSBTAG00000015980	FASN	fatty acid synthase	4774.38	1.94982	Up	<0.0001	<0.0001
mRNA	ENSBTAG00000020657	FAT1	FAT atypical cadherin 1	1738.8	1.9671	Up	<0.0001	<0.0001
mRNA	ENSBTAG00000003219	FBXL7	F-box and leucine rich repeat protein 7	230.356	1.92726	Up	<0.0001	<0.0001
mRNA	ENSBTAG00000021393	FLRT2	fibronectin leucine rich transmembrane protein 2	59.9116	1.76282	Up	<0.0001	<0.0001
mRNA	ENSBTAG00000011970	FNIP2	folliculin interacting protein 2	1067.07	1.65859	Up	<0.0001	<0.0001
mRNA	ENSBTAG00000015151	FOXN2	forkhead box N2	241.779	1.65191	Up	<0.0001	0.0001
mRNA	ENSBTAG00000011234	FOXO3	forkhead box O3	313.635	2.35937	Up	<0.0001	<0.0001
mRNA	ENSBTAG00000003440	FRRS1	ferric-chelate reductase 1	49.1162	1.74417	Up	<0.0001	<0.0001
mRNA	ENSBTAG00000020957	FZD5	frizzled class receptor 5	1430.95	1.97483	Up	<0.0001	<0.0001
mRNA	ENSBTAG00000013810	GABBR2	gamma-aminobutyric acid type B receptor subunit 2	60.8653	1.74078	Up	<0.0001	<0.0001
mRNA	ENSBTAG00000034113	GALNT10	polypeptide N-acetylgalactosaminyltransferase 10	152.604	1.50354	Up	<0.0001	<0.0001
mRNA	ENSBTAG00000017069	GASK1B	golgi Associated Kinase 1B	407.241	2.22918	Up	<0.0001	<0.0001
mRNA	ENSBTAG00000039326	GCNT2	glucosaminyl	430.05	1.65027	Up	<0.0001	<0.0001
mRNA	ENSBTAG00000015618	GDF15	growth differentiation factor 15	35.181	1.77245	Up	<0.0001	<0.0001
mRNA	ENSBTAG00000049619	GFOD1	glucose-Fructose Oxidoreductase Domain Containing 1	146.969	2.24258	Up	<0.0001	<0.0001
mRNA	ENSBTAG00000017626	GFPT1	glutamine--fructose-6-phosphate transaminase 1	175.276	1.89197	Up	<0.0001	0.0001
mRNA	ENSBTAG00000019256	GLA	galactosidase, alpha	120.372	1.77893	Up	<0.0001	<0.0001
mRNA	ENSBTAG00000001405	GLCE	glucuronic acid epimerase	983.831	1.71153	Up	<0.0001	<0.0001
mRNA	ENSBTAG00000009789	GNAQ	G protein subunit alpha q	281.356	2.23533	Up	<0.0001	<0.0001
mRNA	ENSBTAG00000011917	GPAM	glycerol-3-phosphate acyltransferase, mitochondrial	1591.87	2.07034	Up	<0.0001	<0.0001
mRNA	ENSBTAG00000004204	GPR107	G protein-coupled receptor 107	270.261	2.60762	Up	<0.0001	<0.0001
mRNA	ENSBTAG00000000102	GPR75	G protein-coupled receptor 75	36.3729	2.07816	Up	<0.0001	<0.0001
mRNA	ENSBTAG00000002980	GPT2	glutamic--pyruvic transaminase 2	796.572	2.50446	Up	<0.0001	<0.0001
mRNA	ENSBTAG00000032642	GSTA3	glutathione S-transferase alpha 3	281.41	-1.55803	Down	<0.0001	0.0002
mRNA	ENSBTAG00000015024	GXYLT1	glucoside xylosyltransferase 1	96.0888	1.89941	Up	<0.0001	<0.0001
mRNA	ENSBTAG00000004246	H6PD	hexose-6-phosphate dehydrogenase	1843.69	2.79011	Up	<0.0001	<0.0001
mRNA	ENSBTAG00000016276	HAL	histidine ammonia-lyase	1181.13	1.68241	Up	<0.0001	<0.0001
mRNA	ENSBTAG00000021396	HEG1	heart development protein with EGF like domains 1	458.365	1.95042	Up	<0.0001	<0.0001
mRNA	ENSBTAG00000011322	HIPK1	homeodomain interacting protein kinase 1	565.397	1.75507	Up	<0.0001	<0.0001
mRNA	ENSBTAG00000017860	HIPK2	homeodomain interacting protein kinase 2	359.872	2.23921	Up	<0.0001	<0.0001
mRNA	ENSBTAG00000014884	HIPK3	homeodomain interacting protein kinase 3	898.07	1.89009	Up	<0.0001	<0.0001
mRNA	ENSBTAG00000007840	HMGCR	3-hydroxy-3-methylglutaryl-CoA reductase	14614.1	1.85972	Up	<0.0001	<0.0001
mRNA	ENSBTAG00000011839	HMGCS1	3-hydroxy-3-methylglutaryl-CoA synthase 1	33477.6	1.68762	Up	<0.0001	<0.0001
mRNA	ENSBTAG00000012116	HNF4A	hepatocyte nuclear factor 4 alpha	7609.99	1.69698	Up	<0.0001	<0.0001
mRNA	ENSBTAG00000005976	HSD17B7	hydroxysteroid 17-beta dehydrogenase 7	973.911	1.89893	Up	<0.0001	<0.0001
mRNA	ENSBTAG00000011056	IDS	iduronate 2-sulfatase	169.455	2.45255	Up	<0.0001	<0.0001
mRNA	ENSBTAG00000045704	IGSF11	immunoglobulin superfamily member 11	426.29	1.54173	Up	<0.0001	<0.0001
mRNA	ENSBTAG00000019084	INHBC	inhibin beta C subunit	1250.55	1.83168	Up	<0.0001	<0.0001
mRNA	ENSBTAG00000001448	INMT	indolethylamine N-methyltransferase	97.6978	1.60756	Up	<0.0001	<0.0001
mRNA	ENSBTAG00000012687	INSR	insulin receptor	848.77	1.56166	Up	<0.0001	<0.0001
mRNA	ENSBTAG00000016525	ITGA1	integrin subunit alpha 1	812.096	1.52861	Up	<0.0001	<0.0001
mRNA	ENSBTAG00000019929	ITGAV	integrin subunit alpha V	723.687	1.97889	Up	<0.0001	<0.0001
mRNA	ENSBTAG00000013300	KCNMA1	potassium calcium-activated channel subfamily M alpha 1	1069.45	1.73222	Up	<0.0001	<0.0001
mRNA	ENSBTAG00000016729	KCNT2	potassium sodium-activated channel subfamily T member 2	72.8348	1.54377	Up	0.0033	0.0093
mRNA	ENSBTAG00000021231	KCTD2	potassium channel tetramerization domain containing 2	224.235	1.73268	Up	<0.0001	<0.0001
mRNA	ENSBTAG00000020472	KDM5A	lysine demethylase 5A	715.228	1.54664	Up	0.0005	0.0018
mRNA	ENSBTAG00000017691	KIAA0040	KIAA0040 ortholog	57.0894	1.6193	Up	<0.0001	<0.0001
mRNA	ENSBTAG00000044022	KIAA1671	KIAA1671 ortholog	494.907	1.88367	Up	<0.0001	<0.0001
mRNA	ENSBTAG00000014517	KLB	klotho beta	1926.3	1.51119	Up	<0.0001	<0.0001
mRNA	ENSBTAG00000016229	KLF9	Kruppel like factor 9	740.109	1.76787	Up	<0.0001	<0.0001
mRNA	ENSBTAG00000009773	KREMEN1	kringle containing transmembrane protein 1	185.446	2.15426	Up	<0.0001	<0.0001
mRNA	ENSBTAG00000005910	LEPR	leptin receptor	868.217	2.00308	Up	<0.0001	<0.0001
mRNA	ENSBTAG00000020142	LMBRD2	LMBR1 domain containing 2	133.179	1.68791	Up	0.0008	0.0027
mRNA	ENSBTAG00000019900	LNPEP	leucyl and cystinyl aminopeptidase	229.204	1.60603	Up	0.0001	0.0005
mRNA	ENSBTAG00000005137	LPGAT1	lysophosphatidylglycerol acyltransferase 1	743.346	2.02889	Up	<0.0001	<0.0001
mRNA	ENSBTAG00000007689	LPIN1	lipin 1	637.68	1.95176	Up	<0.0001	<0.0001
mRNA	ENSBTAG00000012060	LPIN2	lipin 2	3923.45	1.94	Up	<0.0001	<0.0001
mRNA	ENSBTAG00000044001	LPP	LIM domain containing preferred translocation partner in lipoma	102.045	1.70976	Up	<0.0001	<0.0001
mRNA	ENSBTAG00000018546	LRBA	LPS responsive beige-like anchor protein	1394	1.72786	Up	<0.0001	<0.0001
mRNA	ENSBTAG00000010830	LRP1	LDL receptor related protein 1	33187.3	1.75065	Up	<0.0001	<0.0001
mRNA	ENSBTAG00000047062	LRP3	LDL receptor related protein 3	77.0952	-2.29214	Down	<0.0001	<0.0001
mRNA	ENSBTAG00000011761	LRP6	LDL receptor related protein 6	1484.8	2.045	Up	<0.0001	<0.0001
mRNA	ENSBTAG00000017882	LRRC3	leucine rich repeat containing 3	1344.81	2.52288	Up	<0.0001	<0.0001
mRNA	ENSBTAG00000033170	LRRC58	leucine rich repeat containing 58	175.331	1.66983	Up	0.0002	0.0008
mRNA	ENSBTAG00000020214	LRRC8B	leucine rich repeat containing 8 family member B	145.311	1.71749	Up	<0.0001	<0.0001
mRNA	ENSBTAG00000027713	LYSMD3	LysM domain containing 3	211.145	1.56984	Up	0.0003	0.0013
mRNA	ENSBTAG00000001406	MAB21L3	mab-21 like 3	39.4647	1.89839	Up	<0.0001	<0.0001
mRNA	ENSBTAG00000003586	MAN1A2	mannosidase alpha class 1A member 2	764.031	1.81748	Up	<0.0001	<0.0001
mRNA	ENSBTAG00000025029	MAN2A1	mannosidase alpha class 2A member 1	2432.06	1.83286	Up	<0.0001	<0.0001
mRNA	ENSBTAG00000044082	MARCHF1	Membrane Associated Ring-CH-Type Finger 1	33.7811	1.65699	Up	0.0019	0.0057
mRNA	ENSBTAG00000003536	MARCHF6	Membrane Associated Ring-CH-Type Finger 6	2545.4	1.75927	Up	<0.0001	<0.0001
mRNA	ENSBTAG00000014088	MBNL3	muscleblind like splicing regulator 3	268.786	2.6674	Up	<0.0001	<0.0001
mRNA	ENSBTAG00000008160	MBOAT2	membrane bound O-acyltransferase domain containing 2	1503.94	1.64472	Up	<0.0001	<0.0001
mRNA	ENSBTAG00000044160	MCCC2	methylcrotonoyl-CoA carboxylase 2	436.829	2.70294	Up	<0.0001	<0.0001
mRNA	ENSBTAG00000013706	MEGF9	multiple EGF like domains 9	89.2275	1.70458	Up	0.0001	0.0005
mRNA	ENSBTAG00000007467	MIB1	mindbomb E3 ubiquitin protein ligase 1	1148.77	1.83486	Up	<0.0001	<0.0001
mRNA	ENSBTAG00000006679	MITF	melanogenesis associated transcription factor	206.62	2.06026	Up	<0.0001	<0.0001
mRNA	ENSBTAG00000020050	MLEC	malectin	1505.55	1.71879	Up	<0.0001	<0.0001
mRNA	ENSBTAG00000019162	MRM3	mitochondrial rRNA methyltransferase 3	165.623	1.52213	Up	<0.0001	<0.0001
mRNA	ENSBTAG00000011660	MSMB	microseminoprotein beta	152.544	-2.90781	Down	<0.0001	<0.0001
mRNA	ENSBTAG00000013132	MTX3	metaxin 3	51.6208	1.50029	Up	0.0007	0.0023
mRNA	ENSBTAG00000031217	MYL6B	myosin light chain 6B	41.1992	-4.46375	Down	0.0006	0.0021
mRNA	ENSBTAG00000001350	NA	NA	57.7032	1.51059	Up	<0.0001	<0.0001
mRNA	ENSBTAG00000003367	NA	NA	79.9479	5.52139	Up	<0.0001	<0.0001
mRNA	ENSBTAG00000006363	NA	NA	55.6783	1.53195	Up	<0.0001	<0.0001
mRNA	ENSBTAG00000015651	NA	NA	47.1048	-1.64503	Down	<0.0001	<0.0001
mRNA	ENSBTAG00000016520	NA	NA	34.8011	1.61946	Up	0.0159	0.0365
mRNA	ENSBTAG00000017595	NA	NA	75.4906	3.06197	Up	<0.0001	<0.0001
mRNA	ENSBTAG00000017939	NA	NA	210.449	1.5254	Up	<0.0001	<0.0001
mRNA	ENSBTAG00000019437	NA	NA	2105.79	1.92036	Up	<0.0001	<0.0001
mRNA	ENSBTAG00000020205	NA	NA	304.147	1.93248	Up	<0.0001	<0.0001
mRNA	ENSBTAG00000022084	NA	NA	132.23	1.70561	Up	<0.0001	<0.0001
mRNA	ENSBTAG00000025258	NA	NA	1293.49	1.61316	Up	0.0001	0.0005
mRNA	ENSBTAG00000027015	NA	NA	75.8954	-1.63465	Down	<0.0001	<0.0001
mRNA	ENSBTAG00000030499	NA	NA	1443.18	1.94953	Up	<0.0001	<0.0001
mRNA	ENSBTAG00000030994	NA	NA	56.2489	-1.89683	Down	<0.0001	<0.0001
mRNA	ENSBTAG00000033449	NA	NA	88.5659	1.69109	Up	<0.0001	<0.0001
mRNA	ENSBTAG00000038116	NA	NA	878.246	1.51706	Up	<0.0001	<0.0001
mRNA	ENSBTAG00000038619	NA	NA	991.232	1.85347	Up	<0.0001	<0.0001
mRNA	ENSBTAG00000045746	NA	NA	45.6383	4.6831	Up	<0.0001	<0.0001
mRNA	ENSBTAG00000045876	NA	NA	49.2984	2.23695	Up	<0.0001	0.0001
mRNA	ENSBTAG00000046076	NA	NA	160.883	3.44576	Up	<0.0001	<0.0001
mRNA	ENSBTAG00000047088	NA	NA	720.337	1.52802	Up	<0.0001	<0.0001
mRNA	ENSBTAG00000047181	NA	NA	115.068	-4.05306	Down	0.0005	0.0017
mRNA	ENSBTAG00000047605	NA	NA	1467.58	1.69597	Up	<0.0001	<0.0001
mRNA	ENSBTAG00000047700	NA	NA	1225.45	1.80725	Up	<0.0001	<0.0001
mRNA	ENSBTAG00000048268	NA	NA	134.164	1.54238	Up	0.0015	0.0046
mRNA	ENSBTAG00000048747	NA	NA	136.082	2.41814	Up	<0.0001	<0.0001
mRNA	ENSBTAG00000048780	NA	NA	947.568	1.98527	Up	<0.0001	<0.0001
mRNA	ENSBTAG00000049220	NA	NA	152.532	4.34019	Up	<0.0001	<0.0001
mRNA	ENSBTAG00000049286	NA	NA	153.385	2.67495	Up	<0.0001	<0.0001
mRNA	ENSBTAG00000049368	NA	NA	114.055	1.81865	Up	<0.0001	<0.0001
mRNA	ENSBTAG00000049496	NA	NA	526.96	1.95942	Up	0.0002	0.0008
mRNA	ENSBTAG00000049591	NA	NA	52.2893	1.67786	Up	<0.0001	0.0002
mRNA	ENSBTAG00000049946	NA	NA	151.165	2.33583	Up	<0.0001	<0.0001
mRNA	ENSBTAG00000050122	NA	NA	407.482	1.61182	Up	<0.0001	<0.0001
mRNA	ENSBTAG00000050189	NA	NA	54.299	1.87717	Up	<0.0001	0.0001
mRNA	ENSBTAG00000050417	NA	NA	43.8104	1.85988	Up	<0.0001	<0.0001
mRNA	ENSBTAG00000050611	NA	NA	115.726	-1.88763	Down	<0.0001	<0.0001
mRNA	ENSBTAG00000050618	NA	NA	283.92	2.20128	Up	<0.0001	<0.0001
mRNA	ENSBTAG00000050709	NA	NA	48.0368	1.94502	Up	<0.0001	0.0001
mRNA	ENSBTAG00000051560	NA	NA	189.557	-1.59956	Down	<0.0001	<0.0001
mRNA	ENSBTAG00000051886	NA	NA	41.4333	1.59743	Up	0.0021	0.0063
mRNA	ENSBTAG00000052086	NA	NA	43.3646	1.58329	Up	0.0010	0.0031
mRNA	ENSBTAG00000052092	NA	NA	234.562	2.64464	Up	<0.0001	<0.0001
mRNA	ENSBTAG00000052795	NA	NA	3432.76	2.14917	Up	<0.0001	<0.0001
mRNA	ENSBTAG00000052866	NA	NA	1374.94	1.52941	Up	<0.0001	<0.0001
mRNA	ENSBTAG00000053347	NA	NA	629.855	2.11495	Up	<0.0001	<0.0001
mRNA	ENSBTAG00000053508	NA	NA	51.6376	1.8261	Up	0.0143	0.0333
mRNA	ENSBTAG00000053545	NA	NA	325.098	2.466	Up	<0.0001	<0.0001
mRNA	ENSBTAG00000053952	NA	NA	392.729	1.70425	Up	<0.0001	<0.0001
mRNA	ENSBTAG00000054132	NA	NA	36.0166	2.52992	Up	<0.0001	<0.0001
mRNA	ENSBTAG00000054134	NA	NA	472.323	2.10424	Up	<0.0001	<0.0001
mRNA	ENSBTAG00000054239	NA	NA	379.178	1.85644	Up	<0.0001	<0.0001
mRNA	ENSBTAG00000054594	NA	NA	277.721	1.55417	Up	<0.0001	<0.0001
mRNA	ENSBTAG00000054948	NA	NA	41.0626	1.93764	Up	<0.0001	<0.0001
mRNA	ENSBTAG00000055240	NA	NA	3435.54	2.13774	Up	<0.0001	<0.0001
mRNA	ENSBTAG00000020312	NCOA2	nuclear receptor coactivator 2	1267.74	1.83709	Up	<0.0001	<0.0001
mRNA	ENSBTAG00000011829	NF1	neurofibromin 1	73.7008	1.86495	Up	0.0004	0.0014
mRNA	ENSBTAG00000000074	NFIA	nuclear factor I A	1083.57	1.6607	Up	<0.0001	<0.0001
mRNA	ENSBTAG00000018229	NFIX	nuclear factor I X	273.637	1.80749	Up	<0.0001	<0.0001
mRNA	ENSBTAG00000001666	NIP7	NIP7, nucleolar pre-rRNA processing protein	92.0121	1.51474	Up	<0.0001	<0.0001
mRNA	ENSBTAG00000013048	NIPAL3	NIPA like domain containing 3	146.609	2.01048	Up	<0.0001	<0.0001
mRNA	ENSBTAG00000013152	NIPSNAP1	nipsnap homolog 1	4711.39	2.02855	Up	<0.0001	<0.0001
mRNA	ENSBTAG00000010158	NOS1AP	nitric oxide synthase 1 adaptor protein	87.5234	1.78742	Up	<0.0001	<0.0001
mRNA	ENSBTAG00000007909	NOTCH2	notch 2	1972.55	3.08218	Up	<0.0001	<0.0001
mRNA	ENSBTAG00000044146	NPC1L1	NPC1 like intracellular cholesterol transporter 1	125.222	1.96512	Up	<0.0001	<0.0001
mRNA	ENSBTAG00000040585	NR6A1	nuclear receptor subfamily 6 group A member 1	37.6084	1.74176	Up	<0.0001	<0.0001
mRNA	ENSBTAG00000006732	NRCAM	neuronal cell adhesion molecule	99.0754	5.03062	Up	<0.0001	<0.0001
mRNA	ENSBTAG00000011971	NRP2	neuropilin 2	361.924	1.53891	Up	<0.0001	<0.0001
mRNA	ENSBTAG00000006013	NT5DC3	5'-nucleotidase domain containing 3	44.3108	1.63053	Up	<0.0001	<0.0001
mRNA	ENSBTAG00000019605	OPA3	optic atrophy 3	32.7692	1.90445	Up	<0.0001	<0.0001
mRNA	ENSBTAG00000020990	P2RY14	purinergic receptor P2Y14	57.3897	2.25748	Up	<0.0001	<0.0001
mRNA	ENSBTAG00000010442	PANK1	pantothenate kinase 1	1694.27	1.68924	Up	<0.0001	<0.0001
mRNA	ENSBTAG00000012010	PANX1	pannexin 1	259.035	1.92454	Up	<0.0001	<0.0001
mRNA	ENSBTAG00000010293	PARD3B	par-3 family cell polarity regulator beta	47.0486	1.61917	Up	0.0007	0.0024
mRNA	ENSBTAG00000021601	PARD6B	par-6 family cell polarity regulator beta	207.336	1.63783	Up	<0.0001	<0.0001
mRNA	ENSBTAG00000040313	PARS2	prolyl-tRNA synthetase 2, mitochondrial	118.622	1.75172	Up	<0.0001	<0.0001
mRNA	ENSBTAG00000021975	PATJ	PATJ, crumbs cell polarity complex component	715.583	1.80716	Up	<0.0001	<0.0001
mRNA	ENSBTAG00000019354	PAX8	paired box 8	179.384	1.81554	Up	<0.0001	<0.0001
mRNA	ENSBTAG00000014169	PCDH19	protocadherin 19	286.537	2.63193	Up	<0.0001	<0.0001
mRNA	ENSBTAG00000008101	PCSK5	Proprotein Convertase Subtilisin/Kexin Type 5	558.57	1.87009	Up	<0.0001	<0.0001
mRNA	ENSBTAG00000002783	PCYOX1	prenylcysteine oxidase 1	2749.36	2.19202	Up	<0.0001	<0.0001
mRNA	ENSBTAG00000016979	PCYT1A	phosphate cytidylyltransferase 1, choline, alpha	337.156	2.27137	Up	<0.0001	<0.0001
mRNA	ENSBTAG00000019852	PDHA1	pyruvate dehydrogenase	840.154	2.04043	Up	<0.0001	<0.0001
mRNA	ENSBTAG00000046708	PDP2	pyruvate dehyrogenase phosphatase catalytic subunit 2	701.705	2.31265	Up	<0.0001	<0.0001
mRNA	ENSBTAG00000034436	PDPK1	3-phosphoinositide dependent protein kinase 1	211.244	2.14497	Up	<0.0001	<0.0001
mRNA	ENSBTAG00000003818	PGC	progastricsin	60.4099	-1.70288	Down	0.0002	0.0008
mRNA	ENSBTAG00000005773	PGM2	phosphoglucomutase 2	806.37	2.32393	Up	<0.0001	<0.0001
mRNA	ENSBTAG00000005964	PIGG	phosphatidylinositol glycan anchor biosynthesis class G	184.146	2.0128	Up	<0.0001	<0.0001
mRNA	ENSBTAG00000006499	PIP4K2B	phosphatidylinositol-5-phosphate 4-kinase type 2 beta	590.352	1.75729	Up	<0.0001	<0.0001
mRNA	ENSBTAG00000010742	PKD2L1	polycystin 2 like 1, transient receptor potential cation channel	49.5049	1.73359	Up	<0.0001	<0.0001
mRNA	ENSBTAG00000000052	PKNOX2	PBX/knotted 1 homeobox 2	100.172	1.84223	Up	<0.0001	<0.0001
mRNA	ENSBTAG00000008338	PLCB1	phospholipase C beta 1	481.139	1.73776	Up	0.0002	0.0006
mRNA	ENSBTAG00000014543	PLXNA4	plexin A4	712.528	2.21223	Up	<0.0001	<0.0001
mRNA	ENSBTAG00000020578	PRDM6	PR/SET domain 6	35.419	-1.65286	Down	0.0008	0.0026
mRNA	ENSBTAG00000022169	PREX2	phosphatidylinositol-3,4,5-trisphosphate dependent Rac exchange factor 2	98.2807	1.5594	Up	0.0004	0.0015
mRNA	ENSBTAG00000014205	PRKAR2A	protein kinase, cAMP-dependent, regulatory, type II, alpha	582.265	1.84518	Up	<0.0001	0.0001
mRNA	ENSBTAG00000018996	PRKN	Parkin RBR E3 Ubiquitin Protein Ligase	42.6085	1.90369	Up	<0.0001	<0.0001
mRNA	ENSBTAG00000025035	PRLR	prolactin receptor	2017.41	2.00647	Up	<0.0001	<0.0001
mRNA	ENSBTAG00000048903	PRNP	prion protein	418.285	1.70727	Up	<0.0001	<0.0001
mRNA	ENSBTAG00000045567	PRR15	proline rich 15	103.738	-2.39204	Down	<0.0001	<0.0001
mRNA	ENSBTAG00000012991	PRUNE2	prune homolog 2	491.427	2.1679	Up	0.0002	0.0009
mRNA	ENSBTAG00000033137	PSD3	pleckstrin and Sec7 domain containing 3	370.706	1.68733	Up	<0.0001	<0.0001
mRNA	ENSBTAG00000013721	PSMD10	proteasome 26S subunit, non-ATPase 10	140.997	1.5585	Up	<0.0001	<0.0001
mRNA	ENSBTAG00000008022	PTGFRN	prostaglandin F2 receptor inhibitor	1061.47	1.7339	Up	<0.0001	<0.0001
mRNA	ENSBTAG00000017328	PTI	pancreatic trypsin inhibitor	69.5318	1.61408	Up	<0.0001	0.0001
mRNA	ENSBTAG00000002048	PTPN11	protein tyrosine phosphatase, non-receptor type 11	597.096	1.80677	Up	<0.0001	<0.0001
mRNA	ENSBTAG00000024715	PTPRJ	protein tyrosine phosphatase, receptor type J	1556.66	1.65268	Up	<0.0001	<0.0001
mRNA	ENSBTAG00000046485	RAB1B	RAB1B, member RAS oncogene family	985.614	1.75597	Up	<0.0001	<0.0001
mRNA	ENSBTAG00000032763	RANBP10	RAN binding protein 10	228.661	1.56575	Up	<0.0001	<0.0001
mRNA	ENSBTAG00000018518	RASL10B	RAS like family 10 member B	401.262	1.92148	Up	<0.0001	<0.0001
mRNA	ENSBTAG00000003602	RBPJ	recombination signal binding protein for immunoglobulin kappa J region	216.684	1.57823	Up	<0.0001	<0.0001
mRNA	ENSBTAG00000001950	RDH11	retinol dehydrogenase 11	758.645	2.17892	Up	<0.0001	<0.0001
mRNA	ENSBTAG00000013645	RFFL	ring finger and FYVE like domain containing E3 ubiquitin protein ligase	620.153	1.94222	Up	<0.0001	<0.0001
mRNA	ENSBTAG00000055051	RNF125	ring finger protein 125	1421.9	2.65808	Up	<0.0001	<0.0001
mRNA	ENSBTAG00000002828	RNF185	ring finger protein 185	214.78	1.86245	Up	<0.0001	<0.0001
mRNA	ENSBTAG00000012640	S100A8	S100 calcium binding protein A8	71.1415	-1.57779	Down	<0.0001	<0.0001
mRNA	ENSBTAG00000014269	SCARB1	scavenger receptor class B member 1	1236.12	1.63671	Up	<0.0001	<0.0001
mRNA	ENSBTAG00000055207	SCD	stearoyl-CoA desaturase	9884.26	1.99424	Up	<0.0001	<0.0001
mRNA	ENSBTAG00000024915	SECTM1A	secreted and transmembrane protein 1A	48.0543	1.96271	Up	<0.0001	<0.0001
mRNA	ENSBTAG00000007837	SELENOI	selenoprotein I	173.243	2.15881	Up	<0.0001	<0.0001
mRNA	ENSBTAG00000005021	SEMA5A	semaphorin 5A	71.6625	1.80208	Up	<0.0001	<0.0001
mRNA	ENSBTAG00000018765	SEMA5B	semaphorin 5B	37.312	2.13553	Up	<0.0001	<0.0001
mRNA	ENSBTAG00000001619	SERINC5	serine incorporator 5	359.378	1.61375	Up	<0.0001	<0.0001
mRNA	ENSBTAG00000004034	SESN3	sestrin 3	328.093	1.55336	Up	<0.0001	<0.0001
mRNA	ENSBTAG00000037819	SFT2D2	SFT2 domain containing 2	538.244	1.77907	Up	<0.0001	<0.0001
mRNA	ENSBTAG00000017151	SH3TC2	SH3 domain and tetratricopeptide repeats 2	36.1364	-1.68538	Down	0.0001	0.0004
mRNA	ENSBTAG00000020272	SIK2	salt inducible kinase 2	805.304	1.6247	Up	<0.0001	<0.0001
mRNA	ENSBTAG00000004680	SLC13A5	solute carrier family 13 member 5	1102.5	1.83401	Up	<0.0001	<0.0001
mRNA	ENSBTAG00000004440	SLC15A1	solute carrier family 15 member 1	43.211	1.65899	Up	<0.0001	0.0001
mRNA	ENSBTAG00000012628	SLC1A2	solute carrier family 1 member 2	452.138	3.53961	Up	<0.0001	<0.0001
mRNA	ENSBTAG00000011647	SLC25A15	solute carrier family 25 member 15	1432.95	2.09349	Up	<0.0001	<0.0001
mRNA	ENSBTAG00000039197	SLC2A9	solute carrier family 2 member 9	209.659	2.35768	Up	<0.0001	<0.0001
mRNA	ENSBTAG00000010909	SLC30A1	solute carrier family 30 member 1	1526.95	1.62043	Up	<0.0001	<0.0001
mRNA	ENSBTAG00000031749	SLC35E2	solute carrier family 35, member E2	2395.25	2.63806	Up	<0.0001	<0.0001
mRNA	ENSBTAG00000016094	SLC36A1	solute carrier family 36 member 1	95.6554	1.7832	Up	<0.0001	<0.0001
mRNA	ENSBTAG00000014197	SLC38A4	solute carrier family 38 member 4	8707.9	2.17298	Up	<0.0001	<0.0001
mRNA	ENSBTAG00000021875	SLC41A2	solute carrier family 41 member 2	3068.03	1.84455	Up	<0.0001	<0.0001
mRNA	ENSBTAG00000002348	SLC4A4	solute carrier family 4 member 4	216.15	2.97168	Up	<0.0001	<0.0001
mRNA	ENSBTAG00000012851	SLC5A1	solute carrier family 5 member 1	775.505	1.55708	Up	<0.0001	<0.0001
mRNA	ENSBTAG00000018577	SLC7A1	solute carrier family 7 member 1	37.3095	1.50872	Up	0.0001	0.0002
mRNA	ENSBTAG00000010085	SLC7A2	solute carrier family 7 member 2	660.367	2.72376	Up	<0.0001	<0.0001
mRNA	ENSBTAG00000003282	SLCO1A2	solute carrier organic anion transporter family member 1A2	2370.62	2.0291	Up	<0.0001	<0.0001
mRNA	ENSBTAG00000017761	SMC1A	structural maintenance of chromosomes 1A	489.205	2.10973	Up	<0.0001	<0.0001
mRNA	ENSBTAG00000009639	SMPD3	sphingomyelin phosphodiesterase 3	777.201	1.94536	Up	<0.0001	<0.0001
mRNA	ENSBTAG00000024957	SNCA	synuclein alpha	155.317	-2.96784	Down	0.0070	0.0180
mRNA	ENSBTAG00000048366	SNPH	syntaphilin	216.315	-1.76307	Down	<0.0001	<0.0001
mRNA	ENSBTAG00000001654	SNTB2	syntrophin beta 2	271.137	1.54057	Up	<0.0001	<0.0001
mRNA	ENSBTAG00000000344	SPACA3	sperm acrosome associated 3	49.7679	-1.52032	Down	<0.0001	<0.0001
mRNA	ENSBTAG00000023529	SPEF2	sperm flagellar 2	76.248	2.01806	Up	<0.0001	<0.0001
mRNA	ENSBTAG00000043953	SPIB	Spi-B transcription factor	43.9639	-1.67507	Down	0.0001	0.0002
mRNA	ENSBTAG00000003502	SPOCK1	SPARC/osteonectin, cwcv and kazal like domains proteoglycan 1	79.7499	1.61664	Up	<0.0001	<0.0001
mRNA	ENSBTAG00000010245	SPRY3	sprouty RTK signaling antagonist 3	138.783	2.3785	Up	<0.0001	<0.0001
mRNA	ENSBTAG00000010913	SRXN1	sulfiredoxin 1	58.2623	1.80976	Up	<0.0001	<0.0001
mRNA	ENSBTAG00000001156	ST3GAL1	ST3 beta-galactoside alpha-2,3-sialyltransferase 1	2811.05	2.19071	Up	<0.0001	<0.0001
mRNA	ENSBTAG00000025308	STON2	stonin 2	311.244	1.6375	Up	<0.0001	<0.0001
mRNA	ENSBTAG00000018590	STRN	striatin	189.856	1.53666	Up	<0.0001	<0.0001
mRNA	ENSBTAG00000016078	STXBP4	syntaxin binding protein 4	122.352	1.84632	Up	<0.0001	<0.0001
mRNA	ENSBTAG00000020243	SVEP1	sushi, von Willebrand factor type A, EGF and pentraxin domain containing 1	32.6227	1.65005	Up	0.0004	0.0014
mRNA	ENSBTAG00000020636	SYN3	synapsin III	171.092	1.56161	Up	<0.0001	<0.0001
mRNA	ENSBTAG00000048159	TAB3	TGF-beta activated kinase 1/MAP3K7 binding protein 3	156.183	1.57259	Up	0.0007	0.0024
mRNA	ENSBTAG00000010185	TADA2B	transcriptional adaptor 2B	157.015	1.70739	Up	<0.0001	<0.0001
mRNA	ENSBTAG00000021910	TBL1XR1	transducin beta like 1 X-linked receptor 1	616.743	1.71149	Up	<0.0001	<0.0001
mRNA	ENSBTAG00000032657	TEAD1	TEA domain transcription factor 1	72.7728	1.93315	Up	<0.0001	<0.0001
mRNA	ENSBTAG00000046509	TENT5C	#VALUE!	127.951	2.32491	Up	<0.0001	<0.0001
mRNA	ENSBTAG00000032719	TFRC	transferrin receptor	1625.96	2.34845	Up	<0.0001	<0.0001
mRNA	ENSBTAG00000018035	TGFBR1	transforming growth factor beta receptor 1	164.902	2.007	Up	0.0001	0.0004
mRNA	ENSBTAG00000004364	THNSL2	threonine synthase like 2	498.914	2.17737	Up	<0.0001	<0.0001
mRNA	ENSBTAG00000039630	TMED2	transmembrane p24 trafficking protein 2	2324.39	1.56483	Up	<0.0001	<0.0001
mRNA	ENSBTAG00000020180	TMED5	transmembrane p24 trafficking protein 5	962.899	1.57617	Up	<0.0001	<0.0001
mRNA	ENSBTAG00000007616	TMED6	transmembrane p24 trafficking protein 6	1133.94	-1.71827	Down	<0.0001	<0.0001
mRNA	ENSBTAG00000011389	TMEM104	transmembrane protein 104	143.814	1.95056	Up	<0.0001	<0.0001
mRNA	ENSBTAG00000019750	TMEM106B	transmembrane protein 106B	926.298	1.51332	Up	<0.0001	<0.0001
mRNA	ENSBTAG00000012272	TMEM19	transmembrane protein 19	948.247	1.65805	Up	<0.0001	<0.0001
mRNA	ENSBTAG00000038794	TMEM245	transmembrane protein 245	172.349	1.98312	Up	<0.0001	<0.0001
mRNA	ENSBTAG00000005100	TMEM30A	transmembrane protein 30A	964.586	1.57041	Up	<0.0001	<0.0001
mRNA	ENSBTAG00000016713	TMEM30B	transmembrane protein 30B	834.581	2.43076	Up	<0.0001	<0.0001
mRNA	ENSBTAG00000009023	TMTC3	transmembrane and tetratricopeptide repeat containing 3	139.196	1.59265	Up	0.0010	0.0032
mRNA	ENSBTAG00000045757	TNNC1	troponin C1, slow skeletal and cardiac type	104.811	-4.58088	Down	0.0094	0.0229
mRNA	ENSBTAG00000003983	TOM1L2	target of myb1 like 2 membrane trafficking protein	386.267	1.53462	Up	<0.0001	<0.0001
mRNA	ENSBTAG00000005343	TPH1	tryptophan hydroxylase 1	780.436	1.92196	Up	<0.0001	0.0001
mRNA	ENSBTAG00000007325	TPSB2	tryptase beta 2	32.7768	1.7116	Up	0.0099	0.0241
mRNA	ENSBTAG00000009112	TRAM2	translocation associated membrane protein 2	319.729	1.61161	Up	<0.0001	<0.0001
mRNA	ENSBTAG00000009948	TRIM25	tripartite motif containing 25	1417.62	1.57987	Up	<0.0001	<0.0001
mRNA	ENSBTAG00000007917	TSHZ2	teashirt zinc finger homeobox 2	157.75	1.67403	Up	<0.0001	<0.0001
mRNA	ENSBTAG00000008446	TYW1	tRNA-yW synthesizing protein 1 homolog	471.847	1.79956	Up	<0.0001	<0.0001
mRNA	ENSBTAG00000005444	UGGT1	UDP-glucose glycoprotein glucosyltransferase 1	889.161	1.61648	Up	<0.0001	0.0001
mRNA	ENSBTAG00000002701	UGT3A2	UDP glycosyltransferase family 3 member A2	1834.96	1.65357	Up	<0.0001	<0.0001
mRNA	ENSBTAG00000012694	UHMK1	U2AF homology motif kinase 1	868.801	2.29549	Up	<0.0001	<0.0001
mRNA	ENSBTAG00000014897	UNC5A	unc-5 netrin receptor A	286.853	1.52552	Up	<0.0001	<0.0001
mRNA	ENSBTAG00000010180	URB2	URB2 ribosome biogenesis 2 homolog	562.678	1.51478	Up	<0.0001	<0.0001
mRNA	ENSBTAG00000021000	USF3	upstream transcription factor family member 3	447.397	1.70897	Up	0.0001	0.0002
mRNA	ENSBTAG00000000986	USH1C	USH1 protein network component harmonin	76.3356	1.82548	Up	<0.0001	<0.0001
mRNA	ENSBTAG00000011744	USP31	ubiquitin specific peptidase 31	149.399	1.72009	Up	<0.0001	<0.0001
mRNA	ENSBTAG00000049615	VAMP7	vesicle-associated membrane protein 7	141.238	1.60236	Up	<0.0001	<0.0001
mRNA	ENSBTAG00000005788	VANGL1	VANGL planar cell polarity protein 1	227.315	1.54496	Up	<0.0001	<0.0001
mRNA	ENSBTAG00000014336	WBP1L	WW domain binding protein 1-like	667.129	1.79098	Up	<0.0001	<0.0001
mRNA	ENSBTAG00000053588	WDTC1	WD and tetratricopeptide repeats 1	713.871	1.61273	Up	<0.0001	<0.0001
mRNA	ENSBTAG00000005221	WNK1	WNK lysine deficient protein kinase 1	2166.97	1.61722	Up	<0.0001	<0.0001
mRNA	ENSBTAG00000005523	XYLT1	xylosyltransferase 1	49.4039	2.31435	Up	<0.0001	<0.0001
mRNA	ENSBTAG00000039307	YAP1	Yes associated protein 1	166.442	1.62007	Up	<0.0001	<0.0001
mRNA	ENSBTAG00000011266	ZBTB16	zinc finger and BTB domain containing 16	319.112	1.73991	Up	<0.0001	<0.0001
mRNA	ENSBTAG00000011928	ZBTB20	zinc finger and BTB domain containing 20	146.989	1.87648	Up	<0.0001	<0.0001
mRNA	ENSBTAG00000021617	ZC3HAV1	zinc finger CCCH-type containing, antiviral 1	1411.99	1.50067	Up	<0.0001	0.0002
mRNA	ENSBTAG00000015808	ZNF609	zinc finger protein 609	784.228	1.74977	Up	<0.0001	<0.0001
mRNA	ENSBTAG00000001919	ZNF652	zinc finger protein 652	200.221	1.77808	Up	<0.0001	<0.0001
mRNA	ENSBTAG00000012648	ZSWIM5	zinc finger SWIM-type containing 5	41.6469	1.63429	Up	<0.0001	<0.0001
