# Supplementary material for: Changes in The Liver Transcriptome and Physiological Parameters of Japanese Black Steers During The Fattening Period
Source: Research Square preprint supplement (doi:10.21203/rs.3.rs-882318/v1), 2021-09-15
Supplement: Supplementary file 11 [file 2f609d3ff3956331c4e880f0.xlsx]

## Sheet: Stable 3. RNAseq overview
Supplementary Table S3
Sample		Total Bases	Read Count	GC (%)	AT (%)	Q20 (%)	Q30 (%)
Period	N
T1	20	5.00971e+09	49601115	49.8976	50.1024	98.5089	95.387
T2	19	5.03686e+09	4.98699e+07	49.9515	50.0485	98.7171	95.8286
T3	19	5.18802e+09	5.13665e+07	49.3587	50.6413	98.7318	95.8437
