# Supplementary material for: Changes in The Liver Transcriptome and Physiological Parameters of Japanese Black Steers During The Fattening Period
Source: Research Square preprint supplement (doi:10.21203/rs.3.rs-882318/v1), 2021-09-15
Supplement: Supplementary file 12 [file 5892143721296ecaad56cecb.xlsx]

## Sheet: Stable 4. RNAseq all
Supplementary Table S4
Sample		Total Bases	Read Count	GC (%)	AT (%)	Q20 (%)	Q30 (%)
Period	Cattle No.
T1	1	4697327796	46508196	50.157	49.843	98.743	95.865
	2	5088895100	50385100	49.648	50.352	98.754	95.875
	3	5399198410	53457410	49.625	50.375	98.774	95.963
	4	4535676488	44907688	48.91	51.09	98.76	95.84
	5	4896393746	48479146	50.246	49.754	98.676	95.681
	6	4795746640	47482640	49.481	50.519	98.752	95.917
	7	5342651944	52897544	49.339	50.661	98.679	95.715
	8	5892097398	58337598	48.906	51.094	98.655	95.64
	9	4497337696	44528096	51.8	48.2	98.32	95
	10	4263987296	42217696	47.736	52.26	98.208	94.79
	11	5329484170	52767170	52.47	47.53	98.52	95.46
	12	4881008214	48326814	51.01	48.99	98.56	95.52
	13	4467076480	44228480	47.694	52.31	98.323	95.044
	14	4792707146	47452546	50.55	49.45	98.38	95.12
	15	5429852920	53760920	49.9	50.1	98.44	95.2
	16	5289959840	52375840	48.438	51.56	98.316	95.079
	17	5878763580	58205580	49.37	50.63	98.26	94.8
	18	4830898882	47830682	52.33	47.67	98.34	95
	19	5144782642	50938442	52.16	47.84	98.4	95.19
	20	4740405306	46934706	48.183	51.82	98.319	95.042
T2	1	4792188612	47447412	49.317	50.683	98.769	95.961
	2	5378922862	53256662	50.366	49.634	98.83	96.071
	3	5137132902	50862702	49.364	50.636	98.703	95.812
	4	6751845960	66849960	49.607	50.393	98.298	94.726
	5	4069150620	40288620	49.334	50.666	98.727	95.855
	6	5106410520	50558520	49.142	50.858	98.787	95.968
	7	5079719048	50294248	49.631	50.369	98.759	95.917
	8	4396940868	43534068	50.31	49.69	98.714	95.857
	9	5013866644	49642244	51.07	48.93	98.763	96.007
	10	5460456122	54063922	51.581	48.419	98.73	95.903
	11	4786869548	47394748	51.532	48.468	98.823	96.111
	12	4693183766	46467166	50.5	49.5	98.72	95.871
	13	4267137082	42248882	51.195	48.805	98.824	96.108
	14	5593855710	55384710	49.342	50.658	98.62	95.545
	15	4648561966	46025366	50.661	49.339	98.767	95.939
	16	7860394690	77825690	49.157	50.843	98.474	95.23
	17	4456092124	44119724	49.343	50.657	98.754	95.91
	18	4251701050	42096050	49.439	50.561	98.759	95.945
	19	4078560588	40381788	49.358	50.642	98.695	95.783
	20	4914192976	48655376	48.782	51.218	98.827	96.053
T3	1	4812245798	47645998	49.247	50.753	98.828	96.101
	2	4337562362	42946162	48.931	51.069	98.824	96.03
	3	4375640372	43323172	48.736	51.264	98.709	95.79
	4	6904254152	68358952	49.794	50.206	98.468	95.238
	5	4798324564	47508164	49.175	50.825	98.773	95.938
	6	5503958236	54494636	49.183	50.817	98.58	95.469
	7	4217457202	41757002	49.211	50.789	98.747	95.863
	8	4378407166	43350566	49.021	50.979	98.669	95.678
	9	4587005698	45415898	49.032	50.968	98.842	96.125
	10	4677398476	46310876	49.268	50.732	98.732	95.859
	11	4797886426	47503826	48.316	51.684	98.783	95.96
	12	6184156876	61229276	49.53	50.47	98.748	95.855
	13	5881505528	58232728	49.415	50.585	98.76	95.918
	14	6517531616	64530016	51.233	48.767	98.746	95.911
	15	6434995628	63712828	49.316	50.684	98.768	95.939
	16	4625563660	45797660	49.283	50.717	98.672	95.707
	17	5806902686	57494086	49.947	50.053	98.801	96.004
	18	5483484122	54291922	49.368	50.632	98.805	96.003
	19	4248079998	42060198	49.81	50.19	98.65	95.642
