# Supplementary material for: Changes in The Liver Transcriptome and Physiological Parameters of Japanese Black Steers During The Fattening Period
Source: Research Square preprint supplement (doi:10.21203/rs.3.rs-882318/v1), 2021-09-15
Supplement: Supplementary file 14 [file 7be64569136e37df6cf569c6.xlsx]

## Sheet: STable 5. DEGs CW
Supplementary Table S5
Period	gene_ID	gene_name	baseMean	log2FoldChange
T1	ENSBTAG00000004014	FBLN2	865.684	2.48354
	ENSBTAG00000008288	ANKRD26	280.989	-1.98928
	ENSBTAG00000012991	PRUNE2	545.305	2.58901
T2	ENSBTAG00000044167	TOPAZ1	30.9489	8.29647
	ENSBTAG00000052606	TRIM5	216.728	2.38971
T3	ENSBTAG00000006419	TNNT1	63.7111	-23.1389
	ENSBTAG00000006730	SUSD2	293.822	1.78504
	ENSBTAG00000009703	MYH7	91.535	-22.7244
	ENSBTAG00000018369	MYL2	154.945	-24.3784
	ENSBTAG00000024255	UOX	1941.09	-1.78415
	ENSBTAG00000030674	AK4	936.7	-1.79221
	ENSBTAG00000045757	TNNC1	126.625	-22.8268
	ENSBTAG00000046332	ACTA1	302.964	-24.8294
	ENSBTAG00000048822	ANXA13	73.16	2.4519
