# Supplementary material for: Changes in The Liver Transcriptome and Physiological Parameters of Japanese Black Steers During The Fattening Period
Source: Research Square preprint supplement (doi:10.21203/rs.3.rs-882318/v1), 2021-09-15
Supplement: Supplementary file 15 [file 8e9a0fe8b0764a423e642e50.xlsx]

## Sheet: Stable 8. GO ALL
Supplementary Table S8
GO Term ID	Description	No.of DEGs	No. of total genes	%	P-value	Enrichment	FDR
Biological process
GO:0044699	single-organism process	202	245	64.3312	0.0145	1.0787	0.461
GO:0044763	single-organism cellular process	181	245	57.6433	0.053	1.0729	0.9221
GO:0008152	metabolic process	155	245	49.3631	0.0926	1.0763	0.9915
GO:0032501	multicellular organismal process	112	245	35.6688	0.0019	1.2584	0.2328
GO:0044707	single-multicellular organism process	104	245	33.121	0.0001	1.3942	0.0536
GO:0007154	cell communication	97	245	30.8917	0.0425	1.167	0.8516
GO:0023052	signaling	96	245	30.5732	0.0465	1.1641	0.8966
GO:0051179	localization	95	245	30.2548	0.0025	1.292	0.2528
GO:0044700	single organism signaling	95	245	30.2548	0.0509	1.1612	0.9221
GO:0009058	biosynthetic process	92	245	29.2994	0.0205	1.2106	0.5851
GO:1901576	organic substance biosynthetic process	89	245	28.3439	0.0333	1.1931	0.7703
GO:0044767	single-organism developmental process	88	245	28.0255	0.0079	1.2641	0.3447
GO:0032502	developmental process	88	245	28.0255	0.0146	1.2355	0.4611
GO:0048856	anatomical structure development	86	245	27.3885	0.0157	1.2369	0.4888
GO:0051234	establishment of localization	80	245	25.4777	0.0007	1.4014	0.1597
GO:0006810	transport	79	245	25.1592	0.0003	1.4444	0.121
GO:0007275	multicellular organism development	79	245	25.1592	0.0068	1.2981	0.3228
GO:0048518	positive regulation of biological process	79	245	25.1592	0.0617	1.1783	0.9543
GO:0044710	single-organism metabolic process	78	245	24.8408	0	1.5843	0.0184
GO:0048731	system development	74	245	23.5669	0.0037	1.3465	0.2852
GO:0044267	cellular protein metabolic process	71	245	22.6115	0.0907	1.1687	0.9915
GO:0048869	cellular developmental process	66	245	21.0191	0.0411	1.2352	0.836
GO:0048523	negative regulation of cellular process	64	245	20.3822	0.0835	1.1898	0.9915
GO:0043412	macromolecule modification	63	245	20.0637	0.0157	1.3088	0.4888
GO:0030154	cell differentiation	63	245	20.0637	0.0189	1.2969	0.5563
GO:0006464	cellular protein modification process	62	245	19.7452	0.0071	1.3639	0.3228
GO:0036211	protein modification process	62	245	19.7452	0.0071	1.3639	0.3228
GO:0042221	response to chemical	61	245	19.4268	0.0058	1.3812	0.3156
GO:1902578	single-organism localization	60	245	19.1083	0.0024	1.4419	0.251
GO:0044765	single-organism transport	59	245	18.7898	0.0007	1.5222	0.1597
GO:0048513	animal organ development	56	245	17.8344	0.0092	1.378	0.3586
GO:0048583	regulation of response to stimulus	54	245	17.1975	0.0964	1.2048	0.9915
GO:0006796	phosphate-containing compound metabolic process	53	245	16.879	0.0062	1.4247	0.3228
GO:0006793	phosphorus metabolic process	53	245	16.879	0.0065	1.4207	0.3228
GO:0065008	regulation of biological quality	53	245	16.879	0.0938	1.2102	0.9915
GO:0071702	organic substance transport	49	245	15.6051	0.0006	1.6264	0.1583
GO:0051239	regulation of multicellular organismal process	48	245	15.2866	0.0127	1.4026	0.4207
GO:0010646	regulation of cell communication	48	245	15.2866	0.0542	1.2787	0.9221
GO:0023051	regulation of signaling	48	245	15.2866	0.063	1.265	0.9641
GO:0035556	intracellular signal transduction	47	245	14.9682	0.0135	1.4046	0.4383
GO:0070887	cellular response to chemical stimulus	45	245	14.3312	0.0037	1.5287	0.2852
GO:0007166	cell surface receptor signaling pathway	45	245	14.3312	0.007	1.4754	0.3228
GO:0032879	regulation of localization	45	245	14.3312	0.0086	1.4576	0.3543
GO:0007399	nervous system development	43	245	13.6943	0.0011	1.655	0.1869
GO:0010033	response to organic substance	43	245	13.6943	0.0118	1.4468	0.4163
GO:0051246	regulation of protein metabolic process	43	245	13.6943	0.0505	1.3108	0.9221
GO:0009966	regulation of signal transduction	43	245	13.6943	0.0872	1.2552	0.9915
GO:0048468	cell development	40	245	12.7389	0.0088	1.5016	0.3543
GO:0032268	regulation of cellular protein metabolic process	40	245	12.7389	0.0543	1.3214	0.9221
GO:0065009	regulation of molecular function	39	245	12.4204	0.0735	1.2944	0.9915
GO:0006629	lipid metabolic process	38	245	12.1019	0	2.4421	0.0025
GO:0044281	small molecule metabolic process	38	245	12.1019	0.0034	1.617	0.2753
GO:0031324	negative regulation of cellular metabolic process	37	245	11.7834	0.0522	1.346	0.9221
GO:0051049	regulation of transport	36	245	11.465	0.0016	1.72	0.2183
GO:0006468	protein phosphorylation	36	245	11.465	0.0045	1.616	0.2871
GO:0016310	phosphorylation	36	245	11.465	0.0421	1.3781	0.8485
GO:0050793	regulation of developmental process	36	245	11.465	0.0831	1.2988	0.9915
GO:0009605	response to external stimulus	35	245	11.1465	0.0626	1.3398	0.9641
GO:0010605	negative regulation of macromolecule metabolic process	35	245	11.1465	0.078	1.3131	0.9915
GO:0019220	regulation of phosphate metabolic process	34	245	10.828	0.0091	1.5699	0.3586
GO:0051174	regulation of phosphorus metabolic process	34	245	10.828	0.0092	1.5686	0.3586
GO:0050790	regulation of catalytic activity	34	245	10.828	0.0207	1.478	0.5851
GO:0071310	cellular response to organic substance	34	245	10.828	0.0307	1.4327	0.7196
GO:0009056	catabolic process	33	245	10.5096	0.0659	1.3493	0.966
GO:0031399	regulation of protein modification process	32	245	10.1911	0.0277	1.4668	0.6717
GO:0044711	single-organism biosynthetic process	31	245	9.8726	0.0005	1.9698	0.1516
GO:0008219	cell death	31	245	9.8726	0.0704	1.358	0.9915
GO:1901575	organic substance catabolic process	31	245	9.8726	0.0937	1.3191	0.9915
GO:0001932	regulation of protein phosphorylation	30	245	9.5541	0.0044	1.7238	0.2871
GO:0042325	regulation of phosphorylation	30	245	9.5541	0.0121	1.5969	0.4207
GO:0012501	programmed cell death	30	245	9.5541	0.0598	1.3898	0.9532
GO:0044248	cellular catabolic process	29	245	9.2357	0.0343	1.4768	0.7767
GO:0045595	regulation of cell differentiation	29	245	9.2357	0.0478	1.4316	0.8966
GO:1902531	regulation of intracellular signal transduction	29	245	9.2357	0.0794	1.3602	0.9915
GO:0022008	neurogenesis	28	245	8.9172	0.0361	1.4835	0.7773
GO:0042592	homeostatic process	28	245	8.9172	0.0853	1.3596	0.9915
GO:0015031	protein transport	28	245	8.9172	0.0965	1.3412	0.9915
GO:0040007	growth	27	245	8.5987	0.0001	2.284	0.0949
GO:1901135	carbohydrate derivative metabolic process	27	245	8.5987	0.0036	1.818	0.2852
GO:0006915	apoptotic process	27	245	8.5987	0.0991	1.347	0.9915
GO:0006811	ion transport	26	245	8.2803	0.013	1.6633	0.4248
GO:0010941	regulation of cell death	26	245	8.2803	0.066	1.4215	0.966
GO:0048878	chemical homeostasis	25	245	7.9618	0.0019	1.9756	0.2328
GO:0042981	regulation of apoptotic process	25	245	7.9618	0.0569	1.4588	0.9244
GO:0043067	regulation of programmed cell death	25	245	7.9618	0.0631	1.4423	0.9641
GO:0048699	generation of neurons	25	245	7.9618	0.0654	1.4365	0.966
GO:0044255	cellular lipid metabolic process	24	245	7.6433	0.0014	2.058	0.2121
GO:0030182	neuron differentiation	24	245	7.6433	0.0413	1.5267	0.836
GO:0046903	secretion	23	245	7.3248	0.0042	1.9198	0.2871
GO:0051248	negative regulation of protein metabolic process	23	245	7.3248	0.0068	1.8408	0.3228
GO:0009887	organ morphogenesis	23	245	7.3248	0.0112	1.7609	0.4091
GO:0022414	reproductive process	23	245	7.3248	0.0533	1.502	0.9221
GO:0000003	reproduction	23	245	7.3248	0.0544	1.4986	0.9221
GO:0005975	carbohydrate metabolic process	22	245	7.0064	0.0013	2.1664	0.2056
GO:0006082	organic acid metabolic process	22	245	7.0064	0.0049	1.9335	0.2889
GO:0044092	negative regulation of molecular function	22	245	7.0064	0.0081	1.8472	0.3526
GO:0055085	transmembrane transport	22	245	7.0064	0.0265	1.642	0.6705
GO:0009790	embryo development	22	245	7.0064	0.0392	1.5753	0.8113
GO:0010648	negative regulation of cell communication	22	245	7.0064	0.0652	1.4849	0.966
GO:0023057	negative regulation of signaling	22	245	7.0064	0.0672	1.4795	0.967
GO:0009719	response to endogenous stimulus	22	245	7.0064	0.0914	1.4236	0.9915
GO:0008610	lipid biosynthetic process	21	245	6.6879	0	3.1019	0.0184
GO:1901137	carbohydrate derivative biosynthetic process	21	245	6.6879	0.001	2.27	0.1869
GO:0051050	positive regulation of transport	21	245	6.6879	0.0068	1.9142	0.3228
GO:0032269	negative regulation of cellular protein metabolic process	21	245	6.6879	0.0126	1.8035	0.4207
GO:0072358	cardiovascular system development	21	245	6.6879	0.0269	1.6642	0.6705
GO:0072359	circulatory system development	21	245	6.6879	0.0269	1.6642	0.6705
GO:0009968	negative regulation of signal transduction	21	245	6.6879	0.064	1.5075	0.966
GO:1901700	response to oxygen-containing compound	21	245	6.6879	0.0666	1.4999	0.966
GO:0045859	regulation of protein kinase activity	20	245	6.3694	0.0006	2.4165	0.1583
GO:0043549	regulation of kinase activity	20	245	6.3694	0.0021	2.1828	0.2328
GO:0019752	carboxylic acid metabolic process	20	245	6.3694	0.0072	1.9457	0.3235
GO:0043436	oxoacid metabolic process	20	245	6.3694	0.0078	1.9323	0.3447
GO:0051338	regulation of transferase activity	20	245	6.3694	0.0087	1.9095	0.3543
GO:0048589	developmental growth	19	245	6.051	0.0011	2.3771	0.1869
GO:0044723	single-organism carbohydrate metabolic process	19	245	6.051	0.0015	2.3155	0.2121
GO:0043086	negative regulation of catalytic activity	19	245	6.051	0.002	2.2475	0.2328
GO:0000904	cell morphogenesis involved in differentiation	19	245	6.051	0.0164	1.8263	0.5006
GO:0032880	regulation of protein localization	19	245	6.051	0.0521	1.5953	0.9221
GO:0070201	regulation of establishment of protein localization	18	245	5.7325	0.0211	1.8136	0.5923
GO:0007417	central nervous system development	18	245	5.7325	0.0294	1.7451	0.7007
GO:0006812	cation transport	18	245	5.7325	0.0359	1.7012	0.7773
GO:0007167	enzyme linked receptor protein signaling pathway	18	245	5.7325	0.0368	1.6956	0.7773
GO:0030001	metal ion transport	17	245	5.414	0.0107	2.0109	0.3954
GO:0051223	regulation of protein transport	17	245	5.414	0.0193	1.8771	0.5583
GO:0032940	secretion by cell	17	245	5.414	0.055	1.6397	0.9221
GO:0032787	monocarboxylic acid metabolic process	16	245	5.0955	0.0024	2.44	0.251
GO:0031400	negative regulation of protein modification process	16	245	5.0955	0.0042	2.303	0.2871
GO:0040008	regulation of growth	16	245	5.0955	0.0107	2.0706	0.3954
GO:0044712	single-organism catabolic process	16	245	5.0955	0.0593	1.6595	0.9491
GO:0031175	neuron projection development	16	245	5.0955	0.0886	1.5646	0.9915
GO:0043066	negative regulation of apoptotic process	16	245	5.0955	0.0944	1.5432	0.9915
GO:0009100	glycoprotein metabolic process	15	245	4.7771	0.0005	2.9802	0.1519
GO:0007507	heart development	15	245	4.7771	0.0066	2.2691	0.3228
GO:0010563	negative regulation of phosphorus metabolic process	15	245	4.7771	0.0117	2.1159	0.4158
GO:0045936	negative regulation of phosphate metabolic process	15	245	4.7771	0.0117	2.1159	0.4158
GO:0043408	regulation of MAPK cascade	15	245	4.7771	0.046	1.7633	0.8963
GO:0009101	glycoprotein biosynthetic process	14	245	4.4586	0.0005	3.1725	0.1516
GO:0001933	negative regulation of protein phosphorylation	14	245	4.4586	0.002	2.7239	0.2328
GO:0042326	negative regulation of phosphorylation	14	245	4.4586	0.0042	2.4919	0.2871
GO:0032386	regulation of intracellular transport	14	245	4.4586	0.007	2.344	0.3228
GO:0071705	nitrogen compound transport	14	245	4.4586	0.0365	1.8719	0.7773
GO:0019941	modification-dependent protein catabolic process	14	245	4.4586	0.0543	1.7633	0.9221
GO:0043632	modification-dependent macromolecule catabolic process	14	245	4.4586	0.0615	1.7323	0.9543
GO:0048729	tissue morphogenesis	14	245	4.4586	0.0717	1.6843	0.9915
GO:0048598	embryonic morphogenesis	14	245	4.4586	0.0827	1.6492	0.9915
GO:0003006	developmental process involved in reproduction	14	245	4.4586	0.0843	1.6457	0.9915
GO:0000165	MAPK cascade	14	245	4.4586	0.0942	1.6121	0.9915
GO:0071900	regulation of protein serine/threonine kinase activity	13	245	4.1401	0.0055	2.5294	0.3103
GO:1903827	regulation of cellular protein localization	13	245	4.1401	0.0564	1.8067	0.9244
GO:0007423	sensory organ development	13	245	4.1401	0.0602	1.7891	0.9543
GO:0006511	ubiquitin-dependent protein catabolic process	13	245	4.1401	0.0913	1.6671	0.9915
GO:0051046	regulation of secretion	13	245	4.1401	0.0937	1.6558	0.9915
GO:0007420	brain development	13	245	4.1401	0.0975	1.6447	0.9915
GO:0033157	regulation of intracellular protein transport	12	245	3.8217	0.0088	2.4985	0.3543
GO:0007389	pattern specification process	12	245	3.8217	0.0451	1.9457	0.8861
GO:0006897	endocytosis	12	245	3.8217	0.0474	1.929	0.8966
GO:0048667	cell morphogenesis involved in neuron differentiation	12	245	3.8217	0.0645	1.8251	0.966
GO:0009725	response to hormone	12	245	3.8217	0.0952	1.7012	0.9915
GO:0006935	chemotaxis	12	245	3.8217	0.098	1.6927	0.9915
GO:0048812	neuron projection morphogenesis	12	245	3.8217	0.098	1.6927	0.9915
GO:0042330	taxis	12	245	3.8217	0.099	1.6885	0.9915
GO:0006469	negative regulation of protein kinase activity	11	245	3.5032	0.0009	3.651	0.1821
GO:0033673	negative regulation of kinase activity	11	245	3.5032	0.0015	3.3916	0.2121
GO:0051348	negative regulation of transferase activity	11	245	3.5032	0.0027	3.1347	0.2552
GO:0046486	glycerolipid metabolic process	11	245	3.5032	0.0032	3.0726	0.2714
GO:0043413	macromolecule glycosylation	11	245	3.5032	0.0033	3.0575	0.2714
GO:0006486	protein glycosylation	11	245	3.5032	0.0033	3.0575	0.2714
GO:0070085	glycosylation	11	245	3.5032	0.0042	2.9556	0.2871
GO:1901615	organic hydroxy compound metabolic process	11	245	3.5032	0.0166	2.4057	0.5018
GO:0048732	gland development	11	245	3.5032	0.0369	2.104	0.7773
GO:0061564	axon development	11	245	3.5032	0.0609	1.9216	0.9543
GO:0032870	cellular response to hormone stimulus	11	245	3.5032	0.0707	1.8695	0.9915
GO:0044283	small molecule biosynthetic process	11	245	3.5032	0.0747	1.8472	0.9915
GO:0008202	steroid metabolic process	10	245	3.1847	0.0026	3.4197	0.2528
GO:0003007	heart morphogenesis	10	245	3.1847	0.0045	3.1522	0.2871
GO:0048511	rhythmic process	10	245	3.1847	0.0049	3.1174	0.2889
GO:0021700	developmental maturation	10	245	3.1847	0.0097	2.7933	0.3708
GO:0050878	regulation of body fluid levels	10	245	3.1847	0.0206	2.464	0.5851
GO:0048638	regulation of developmental growth	10	245	3.1847	0.0222	2.4321	0.6076
GO:0006631	fatty acid metabolic process	10	245	3.1847	0.0268	2.351	0.6705
GO:0006820	anion transport	10	245	3.1847	0.045	2.1373	0.8861
GO:0003002	regionalization	10	245	3.1847	0.0505	2.0898	0.9221
GO:0045860	positive regulation of protein kinase activity	10	245	3.1847	0.0554	2.0518	0.9221
GO:0043161	proteasome-mediated ubiquitin-dependent protein catabolic process	10	245	3.1847	0.0591	2.0297	0.9491
GO:0016049	cell growth	10	245	3.1847	0.0663	1.9798	0.966
GO:0010498	proteasomal protein catabolic process	10	245	3.1847	0.0918	1.85	0.9915
GO:0033674	positive regulation of kinase activity	10	245	3.1847	0.0933	1.8439	0.9915
GO:0007409	axonogenesis	10	245	3.1847	0.0951	1.8379	0.9915
GO:0060541	respiratory system development	9	245	2.8662	0.0096	3.0408	0.3703
GO:0006066	alcohol metabolic process	9	245	2.8662	0.01	3.0227	0.3751
GO:0006869	lipid transport	9	245	2.8662	0.0244	2.5647	0.6587
GO:0010876	lipid localization	9	245	2.8662	0.0549	2.1795	0.9221
GO:0007178	transmembrane receptor protein serine/threonine kinase signaling pathway	9	245	2.8662	0.0719	2.056	0.9915
GO:0070838	divalent metal ion transport	9	245	2.8662	0.0746	2.0394	0.9915
GO:0072511	divalent inorganic cation transport	9	245	2.8662	0.0773	2.0232	0.9915
GO:0023061	signal release	9	245	2.8662	0.0773	2.0232	0.9915
GO:0001558	regulation of cell growth	9	245	2.8662	0.083	1.9915	0.9915
GO:0008203	cholesterol metabolic process	8	245	2.5478	0.0002	6.6382	0.1161
GO:1902652	secondary alcohol metabolic process	8	245	2.5478	0.0002	6.3577	0.1161
GO:0006638	neutral lipid metabolic process	8	245	2.5478	0.0002	6.3577	0.1161
GO:0016125	sterol metabolic process	8	245	2.5478	0.0004	6.0186	0.1306
GO:0007623	circadian rhythm	8	245	2.5478	0.0032	4.1412	0.2714
GO:0002790	peptide secretion	8	245	2.5478	0.0126	3.2014	0.4207
GO:0015833	peptide transport	8	245	2.5478	0.0171	3.0093	0.5154
GO:0007411	axon guidance	8	245	2.5478	0.0257	2.7693	0.6705
GO:0097485	neuron projection guidance	8	245	2.5478	0.0264	2.7524	0.6705
GO:0042886	amide transport	8	245	2.5478	0.0264	2.7524	0.6705
GO:0009952	anterior/posterior pattern specification	8	245	2.5478	0.0321	2.6397	0.7489
GO:0060485	mesenchyme development	8	245	2.5478	0.0482	2.4139	0.8985
GO:0051235	maintenance of location	8	245	2.5478	0.0715	2.2019	0.9915
GO:0006732	coenzyme metabolic process	8	245	2.5478	0.073	2.1912	0.9915
GO:0016042	lipid catabolic process	8	245	2.5478	0.0938	2.0612	0.9915
GO:0015849	organic acid transport	7	245	2.2293	0.0011	5.9844	0.1869
GO:0006639	acylglycerol metabolic process	7	245	2.2293	0.0015	5.6424	0.2121
GO:0045017	glycerolipid biosynthetic process	7	245	2.2293	0.0054	4.3403	0.3103
GO:0055088	lipid homeostasis	7	245	2.2293	0.006	4.247	0.3217
GO:0015850	organic hydroxy compound transport	7	245	2.2293	0.0162	3.4345	0.5001
GO:1901617	organic hydroxy compound biosynthetic process	7	245	2.2293	0.0218	3.2111	0.6035
GO:0010038	response to metal ion	7	245	2.2293	0.0277	3.0382	0.6717
GO:0014031	mesenchymal cell development	7	245	2.2293	0.0367	2.8415	0.7773
GO:0030324	lung development	7	245	2.2293	0.0461	2.6869	0.8963
GO:0030323	respiratory tube development	7	245	2.2293	0.0474	2.6687	0.8966
GO:0048762	mesenchymal cell differentiation	7	245	2.2293	0.0514	2.6157	0.9221
GO:0045927	positive regulation of growth	7	245	2.2293	0.0774	2.351	0.9915
GO:0071902	positive regulation of protein serine/threonine kinase activity	7	245	2.2293	0.0957	2.2189	0.9915
GO:0009311	oligosaccharide metabolic process	6	245	1.9108	0.0022	6.5105	0.2384
GO:0006641	triglyceride metabolic process	6	245	1.9108	0.0047	5.4604	0.2889
GO:0046165	alcohol biosynthetic process	6	245	1.9108	0.0083	4.7683	0.3543
GO:0006487	protein N-linked glycosylation	6	245	1.9108	0.0088	4.702	0.3543
GO:0051896	regulation of protein kinase B signaling	6	245	1.9108	0.0264	3.5637	0.6705
GO:0003206	cardiac chamber morphogenesis	6	245	1.9108	0.0297	3.4546	0.7007
GO:0035265	organ growth	6	245	1.9108	0.0297	3.4546	0.7007
GO:0002791	regulation of peptide secretion	6	245	1.9108	0.0383	3.2243	0.7978
GO:0006909	phagocytosis	6	245	1.9108	0.0396	3.1938	0.8121
GO:0090087	regulation of peptide transport	6	245	1.9108	0.0396	3.1938	0.8121
GO:0035264	multicellular organism growth	6	245	1.9108	0.0468	3.05	0.8966
GO:0003205	cardiac chamber development	6	245	1.9108	0.0706	2.7084	0.9915
GO:0008361	regulation of cell size	6	245	1.9108	0.0744	2.6657	0.9915
GO:0009755	hormone-mediated signaling pathway	6	245	1.9108	0.0764	2.6449	0.9915
GO:0048469	cell maturation	6	245	1.9108	0.0784	2.6244	0.9915
GO:0042593	glucose homeostasis	6	245	1.9108	0.0845	2.5647	0.9915
GO:0033500	carbohydrate homeostasis	6	245	1.9108	0.0845	2.5647	0.9915
GO:0030072	peptide hormone secretion	6	245	1.9108	0.0909	2.5078	0.9915
GO:0019318	hexose metabolic process	6	245	1.9108	0.0976	2.4532	0.9915
GO:0006695	cholesterol biosynthetic process	5	245	1.5924	0.0026	8.5492	0.2528
GO:1902653	secondary alcohol biosynthetic process	5	245	1.5924	0.0029	8.2977	0.2635
GO:0055010	ventricular cardiac muscle tissue morphogenesis	5	245	1.5924	0.0044	7.4243	0.2871
GO:0016126	sterol biosynthetic process	5	245	1.5924	0.0048	7.2339	0.2889
GO:0003229	ventricular cardiac muscle tissue development	5	245	1.5924	0.0068	6.561	0.3228
GO:0032922	circadian regulation of gene expression	5	245	1.5924	0.0086	6.1331	0.3543
GO:0055008	cardiac muscle tissue morphogenesis	5	245	1.5924	0.0116	5.6424	0.4158
GO:0022600	digestive system process	5	245	1.5924	0.0141	5.3231	0.4534
GO:0003208	cardiac ventricle morphogenesis	5	245	1.5924	0.018	4.9495	0.5376
GO:0060415	muscle tissue morphogenesis	5	245	1.5924	0.0191	4.8642	0.5563
GO:0060395	SMAD protein signal transduction	5	245	1.5924	0.0191	4.8642	0.5563
GO:0051701	interaction with host	5	245	1.5924	0.0226	4.625	0.6139
GO:0048644	muscle organ morphogenesis	5	245	1.5924	0.0277	4.3403	0.6717
GO:0038127	ERBB signaling pathway	5	245	1.5924	0.0291	4.2746	0.7004
GO:0042552	myelination	5	245	1.5924	0.0335	4.0887	0.772
GO:0008366	axon ensheathment	5	245	1.5924	0.0367	3.9736	0.7773
GO:0007272	ensheathment of neurons	5	245	1.5924	0.0367	3.9736	0.7773
GO:0009582	detection of abiotic stimulus	5	245	1.5924	0.049	3.617	0.9099
GO:0009581	detection of external stimulus	5	245	1.5924	0.051	3.5712	0.9221
GO:0035282	segmentation	5	245	1.5924	0.051	3.5712	0.9221
GO:0007586	digestion	5	245	1.5924	0.055	3.483	0.9221
GO:0071901	negative regulation of protein serine/threonine kinase activity	5	245	1.5924	0.057	3.4405	0.9244
GO:0090100	positive regulation of transmembrane receptor protein serine/threonine kinase signaling pathway	5	245	1.5924	0.0591	3.3991	0.9491
GO:0048593	camera-type eye morphogenesis	5	245	1.5924	0.0634	3.3191	0.9652
GO:0009791	post-embryonic development	5	245	1.5924	0.0656	3.2805	0.966
GO:0006937	regulation of muscle contraction	5	245	1.5924	0.0773	3.1002	0.9915
GO:0003231	cardiac ventricle development	5	245	1.5924	0.0822	3.0336	0.9915
GO:0006694	steroid biosynthetic process	5	245	1.5924	0.0926	2.9085	0.9915
GO:0072331	signal transduction by p53 class mediator	5	245	1.5924	0.098	2.8497	0.9915
GO:0019432	triglyceride biosynthetic process	4	245	1.2739	0.005	11.2849	0.2889
GO:0046460	neutral lipid biosynthetic process	4	245	1.2739	0.0057	10.7475	0.3132
GO:0046463	acylglycerol biosynthetic process	4	245	1.2739	0.0057	10.7475	0.3132
GO:0006491	N-glycan processing	4	245	1.2739	0.0065	10.259	0.3228
GO:0071526	semaphorin-plexin signaling pathway	4	245	1.2739	0.0217	6.6382	0.6035
GO:0060042	retina morphogenesis in camera-type eye	4	245	1.2739	0.0253	6.2694	0.6684
GO:1901184	regulation of ERBB signaling pathway	4	245	1.2739	0.0253	6.2694	0.6684
GO:1903825	organic acid transmembrane transport	4	245	1.2739	0.0272	6.0999	0.6705
GO:1905039	carboxylic acid transmembrane transport	4	245	1.2739	0.0272	6.0999	0.6705
GO:0009880	embryonic pattern specification	4	245	1.2739	0.0376	5.3738	0.7885
GO:1990267	response to transition metal nanoparticle	4	245	1.2739	0.0473	4.9065	0.8966
GO:0042632	cholesterol homeostasis	4	245	1.2739	0.0553	4.6061	0.9221
GO:0055092	sterol homeostasis	4	245	1.2739	0.0553	4.6061	0.9221
GO:0051341	regulation of oxidoreductase activity	4	245	1.2739	0.0553	4.6061	0.9221
GO:0032941	secretion by tissue	4	245	1.2739	0.0609	4.4255	0.9543
GO:0030301	cholesterol transport	4	245	1.2739	0.0668	4.2585	0.966
GO:0007589	body fluid secretion	4	245	1.2739	0.0668	4.2585	0.966
GO:0015918	sterol transport	4	245	1.2739	0.0668	4.2585	0.966
GO:0007173	epidermal growth factor receptor signaling pathway	4	245	1.2739	0.0699	4.1796	0.9915
GO:0018107	peptidyl-threonine phosphorylation	4	245	1.2739	0.086	3.8254	0.9915
GO:0051897	positive regulation of protein kinase B signaling	4	245	1.2739	0.086	3.8254	0.9915
GO:0018210	peptidyl-threonine modification	4	245	1.2739	0.1	3.5825	0.9915
GO:0055091	phospholipid homeostasis	3	245	0.9554	0.0044	28.2122	0.2871
GO:0060059	embryonic retina morphogenesis in camera-type eye	3	245	0.9554	0.0044	28.2122	0.2871
GO:0070863	positive regulation of protein exit from endoplasmic reticulum	3	245	0.9554	0.0127	16.9273	0.4207
GO:0045475	locomotor rhythm	3	245	0.9554	0.0127	16.9273	0.4207
GO:0046688	response to copper ion	3	245	0.9554	0.0127	16.9273	0.4207
GO:0003222	ventricular trabecula myocardium morphogenesis	3	245	0.9554	0.0246	12.091	0.6587
GO:0019048	modulation by virus of host morphology or physiology	3	245	0.9554	0.0354	9.9573	0.7773
GO:0070861	regulation of protein exit from endoplasmic reticulum	3	245	0.9554	0.0436	8.9091	0.864
GO:0097035	regulation of membrane lipid distribution	3	245	0.9554	0.0436	8.9091	0.864
GO:0048512	circadian behavior	3	245	0.9554	0.0478	8.4637	0.8966
GO:0007622	rhythmic behavior	3	245	0.9554	0.0523	8.0606	0.9221
GO:2000826	regulation of heart morphogenesis	3	245	0.9554	0.0569	7.6942	0.9244
GO:0048596	embryonic camera-type eye morphogenesis	3	245	0.9554	0.0569	7.6942	0.9244
GO:0006911	phagocytosis, engulfment	3	245	0.9554	0.0569	7.6942	0.9244
GO:0050892	intestinal absorption	3	245	0.9554	0.0616	7.3597	0.9543
GO:0044003	modification by symbiont of host morphology or physiology	3	245	0.9554	0.0616	7.3597	0.9543
GO:0061384	heart trabecula morphogenesis	3	245	0.9554	0.0664	7.0531	0.966
GO:0031128	developmental induction	3	245	0.9554	0.0764	6.5105	0.9915
GO:0050919	negative chemotaxis	3	245	0.9554	0.0869	6.0455	0.9915
GO:0032768	regulation of monooxygenase activity	3	245	0.9554	0.0923	5.837	0.9915
GO:0010324	membrane invagination	3	245	0.9554	0.0923	5.837	0.9915
GO:0072583	clathrin-mediated endocytosis	3	245	0.9554	0.0923	5.837	0.9915
GO:0048048	embryonic eye morphogenesis	3	245	0.9554	0.0978	5.6424	0.9915
GO:0070495	negative regulation of thrombin receptor signaling pathway	2	245	0.6369	0.035	56.4245	0.7767
GO:0032470	positive regulation of endoplasmic reticulum calcium ion concentration	2	245	0.6369	0.035	56.4245	0.7767
GO:0070494	regulation of thrombin receptor signaling pathway	2	245	0.6369	0.035	56.4245	0.7767
GO:0035434	copper ion transmembrane transport	2	245	0.6369	0.035	56.4245	0.7767
GO:0060003	copper ion export	2	245	0.6369	0.035	56.4245	0.7767
GO:0003223	ventricular compact myocardium morphogenesis	2	245	0.6369	0.052	37.6163	0.9221
GO:0060235	lens induction in camera-type eye	2	245	0.6369	0.0688	28.2122	0.9824
GO:0044332	Wnt signaling pathway involved in dorsal/ventral axis specification	2	245	0.6369	0.0688	28.2122	0.9824
GO:0071280	cellular response to copper ion	2	245	0.6369	0.0852	22.5698	0.9915
GO:0045794	negative regulation of cell volume	2	245	0.6369	0.0852	22.5698	0.9915
Cellular components
GO:0043226	organelle	190	274	60.5096	0.0720004	1.06869	0.453969
GO:0043227	membrane-bounded organelle	186	274	59.2357	0.00341414	1.13685	0.05522
GO:0016020	membrane	175	274	55.7325	8.5486e-06	1.25873	0.000636016
GO:0005737	cytoplasm	156	274	49.6815	0.0257318	1.12164	0.225904
GO:0044425	membrane part	145	274	46.1783	1.92235e-06	1.36138	0.000238372
GO:0016021	integral component of membrane	135	274	42.9936	4.2562e-08	1.47772	1.58331e-05
GO:0031224	intrinsic component of membrane	135	274	42.9936	9.44212e-08	1.46016	1.75623e-05
GO:0044444	cytoplasmic part	111	274	35.3503	0.0182335	1.18782	0.194847
GO:0071944	cell periphery	85	274	27.0701	0.0259139	1.21981	0.225904
GO:0005886	plasma membrane	84	274	26.7516	0.0198855	1.23595	0.19993
GO:0031982	vesicle	72	274	22.9299	0.000504834	1.46617	0.014446
GO:0012505	endomembrane system	71	274	22.6115	8.34552e-05	1.56192	0.00344948
GO:0031988	membrane-bounded vesicle	69	274	21.9745	0.000744355	1.46316	0.01846
GO:0070062	extracellular exosome	57	274	18.1529	0.00180598	1.48767	0.0370344
GO:1903561	extracellular vesicle	57	274	18.1529	0.00206908	1.47878	0.0370344
GO:0043230	extracellular organelle	57	274	18.1529	0.00209065	1.4781	0.0370344
GO:0044459	plasma membrane part	48	274	15.2866	0.00268327	1.53195	0.0453716
GO:0031090	organelle membrane	41	274	13.0573	0.0192033	1.42282	0.198434
GO:0098588	bounding membrane of organelle	36	274	11.465	4.96994e-05	2.08132	0.00231102
GO:0005783	endoplasmic reticulum	36	274	11.465	0.000126853	1.98764	0.00428993
GO:0098805	whole membrane	34	274	10.828	7.34942e-06	2.35401	0.000636016
GO:0005887	integral component of plasma membrane	32	274	10.1911	0.00205568	1.77723	0.0370344
GO:0031226	intrinsic component of plasma membrane	32	274	10.1911	0.00394463	1.70185	0.0586961
GO:0005794	Golgi apparatus	29	274	9.23567	0.00391443	1.76334	0.0586961
GO:0005773	vacuole	25	274	7.96178	0.00534419	1.82494	0.0764631
GO:0030054	cell junction	25	274	7.96178	0.013582	1.68138	0.174224
GO:0009986	cell surface	21	274	6.6879	0.00113389	2.24851	0.0263629
GO:0098590	plasma membrane region	21	274	6.6879	0.00137022	2.21076	0.0299836
GO:0005768	endosome	17	274	5.41401	0.0183324	1.89203	0.194847
GO:0005789	endoplasmic reticulum membrane	17	274	5.41401	0.0276002	1.79974	0.230079
GO:0042175	nuclear outer membrane-endoplasmic reticulum membrane network	17	274	5.41401	0.0327387	1.76011	0.248547
GO:0044432	endoplasmic reticulum part	17	274	5.41401	0.0638681	1.6095	0.416823
GO:0043235	receptor complex	15	274	4.77707	0.000240208	3.23055	0.00744645
GO:0045202	synapse	15	274	4.77707	0.0260699	1.91062	0.225904
GO:0098589	membrane region	14	274	4.4586	0.000124679	3.65731	0.00428993
GO:0044431	Golgi apparatus part	14	274	4.4586	0.0589963	1.74388	0.391904
GO:0045121	membrane raft	13	274	4.14013	4.69186e-05	4.34054	0.00231102
GO:0098857	membrane microdomain	13	274	4.14013	4.69186e-05	4.34054	0.00231102
GO:0005911	cell-cell junction	13	274	4.14013	0.0226567	2.08989	0.221797
GO:0070161	anchoring junction	13	274	4.14013	0.0921046	1.66338	0.535358
GO:0005925	focal adhesion	12	274	3.82166	0.0261125	2.12932	0.225904
GO:0005924	cell-substrate adherens junction	12	274	3.82166	0.0278321	2.10942	0.230079
GO:0030055	cell-substrate junction	12	274	3.82166	0.0293871	2.08989	0.237653
GO:0005764	lysosome	12	274	3.82166	0.0322809	2.05813	0.248547
GO:0000323	lytic vacuole	12	274	3.82166	0.0322809	2.05813	0.248547
GO:0005774	vacuolar membrane	12	274	3.82166	0.0537444	1.89141	0.370239
GO:0044437	vacuolar part	12	274	3.82166	0.068436	1.81049	0.438934
GO:0000139	Golgi membrane	11	274	3.50318	0.0441049	2.04177	0.309566
GO:0005765	lysosomal membrane	9	274	2.86624	0.0171089	2.7451	0.194847
GO:0098852	lytic vacuole membrane	9	274	2.86624	0.0171089	2.7451	0.194847
GO:0030424	axon	9	274	2.86624	0.0356396	2.38424	0.259959
GO:0045177	apical part of cell	8	274	2.54777	0.090489	2.08026	0.534316
GO:0044853	plasma membrane raft	7	274	2.2293	0.00064589	6.58315	0.0171622
GO:0016323	basolateral plasma membrane	7	274	2.2293	0.0176077	3.37597	0.194847
GO:0009897	external side of plasma membrane	7	274	2.2293	0.079415	2.33721	0.492373
GO:0005923	bicellular tight junction	6	274	1.91083	0.0129087	4.2856	0.174224
GO:0070160	occluding junction	6	274	1.91083	0.0149809	4.12881	0.185763
GO:0043296	apical junction complex	6	274	1.91083	0.024449	3.64045	0.225904
GO:0019867	outer membrane	6	274	1.91083	0.0564358	2.89369	0.381711
GO:0005770	late endosome	6	274	1.91083	0.097826	2.45335	0.543957
GO:0005901	caveola	5	274	1.59236	0.0132571	5.42567	0.174224
GO:1902911	protein kinase complex	5	274	1.59236	0.0367838	3.97373	0.263146
GO:0005801	cis-Golgi network	3	274	0.955414	0.0869903	6.04575	0.521942
GO:0044304	main axon	3	274	0.955414	0.0978722	5.6427	0.543957
GO:0042587	glycogen granule	2	274	0.636943	0.035004	56.427	0.259959
GO:0005952	cAMP-dependent protein kinase complex	2	274	0.636943	0.085234	22.5708	0.519788
Molecular functions
GO:0003824	catalytic activity	119	231	37.8981	<0.0001	1.3476	0.0090
GO:0043167	ion binding	73	231	23.2484	0.0053	1.3285	0.1510
GO:0046872	metal ion binding	69	231	21.9745	0.0081	1.3210	0.1861
GO:0043169	cation binding	69	231	21.9745	0.0102	1.3082	0.2119
GO:0016740	transferase activity	50	231	15.9236	0.0066	1.4373	0.1735
GO:0005215	transporter activity	38	231	12.1019	0.0002	1.8863	0.0220
GO:0022892	substrate-specific transporter activity	35	231	11.1465	0.0001	2.0561	0.0101
GO:0022891	substrate-specific transmembrane transporter activity	32	231	10.1911	<0.0001	2.2231	0.0090
GO:0022857	transmembrane transporter activity	32	231	10.1911	0.0002	2.0201	0.0223
GO:0015075	ion transmembrane transporter activity	24	231	7.6433	0.0028	1.9464	0.0963
GO:0005509	calcium ion binding	23	231	7.3248	0.0005	2.2834	0.0396
GO:0008324	cation transmembrane transporter activity	21	231	6.6879	0.0011	2.2461	0.0531
GO:0016491	oxidoreductase activity	20	231	6.3694	0.0260	1.6998	0.3962
GO:0022890	inorganic cation transmembrane transporter activity	19	231	6.0510	0.0009	2.4150	0.0499
GO:0046873	metal ion transmembrane transporter activity	17	231	5.4140	0.0007	2.6548	0.0472
GO:0022804	active transmembrane transporter activity	16	231	5.0955	0.0007	2.7822	0.0472
GO:0016757	transferase activity, transferring glycosyl groups	12	231	3.8217	0.0059	2.6367	0.1630
GO:0005342	organic acid transmembrane transporter activity	11	231	3.5032	<0.0001	6.0541	0.0089
GO:0046943	carboxylic acid transmembrane transporter activity	10	231	3.1847	0.0001	5.7261	0.0101
GO:0072509	divalent inorganic cation transmembrane transporter activity	10	231	3.1847	0.0009	3.9642	0.0499
GO:0043492	ATPase activity, coupled to movement of substances	9	231	2.8662	0.0013	4.2165	0.0602
GO:0016758	transferase activity, transferring hexosyl groups	9	231	2.8662	0.0100	3.0189	0.2119
GO:0015291	secondary active transmembrane transporter activity	9	231	2.8662	0.0277	2.5010	0.4135
GO:0048037	cofactor binding	9	231	2.8662	0.0617	2.1258	0.6804
GO:0022853	active ion transmembrane transporter activity	8	231	2.5478	0.0008	5.2733	0.0486
GO:0004553	hydrolase activity, hydrolyzing O-glycosyl compounds	8	231	2.5478	0.0015	4.7240	0.0640
GO:0016798	hydrolase activity, acting on glycosyl bonds	8	231	2.5478	0.0048	3.8433	0.1424
GO:0043168	anion binding	8	231	2.5478	0.0516	2.3744	0.6343
GO:0015171	amino acid transmembrane transporter activity	7	231	2.2293	0.0022	5.2213	0.0780
GO:0005319	lipid transporter activity	7	231	2.2293	0.0030	4.8990	0.0974
GO:0008194	UDP-glycosyltransferase activity	7	231	2.2293	0.0091	3.8904	0.2022
GO:0042626	ATPase activity, coupled to transmembrane movement of substances	7	231	2.2293	0.0119	3.6742	0.2404
GO:0016820	hydrolase activity, acting on acid anhydrides, catalyzing transmembrane movement of substances	7	231	2.2293	0.0130	3.6074	0.2470
GO:0015399	primary active transmembrane transporter activity	7	231	2.2293	0.0146	3.5117	0.2576
GO:0015405	P-P-bond-hydrolysis-driven transmembrane transporter activity	7	231	2.2293	0.0146	3.5117	0.2576
GO:0008509	anion transmembrane transporter activity	7	231	2.2293	0.0760	2.3620	0.7444
GO:0015085	calcium ion transmembrane transporter activity	6	231	1.9108	0.0403	3.1788	0.5415
GO:0016614	oxidoreductase activity, acting on CH-OH group of donors	6	231	1.9108	0.0505	2.9836	0.6343
GO:0015081	sodium ion transmembrane transporter activity	6	231	1.9108	0.0569	2.8825	0.6735
GO:0001047	core promoter binding	6	231	1.9108	0.0831	2.5767	0.7779
GO:0015179	L-amino acid transmembrane transporter activity	5	231	1.5924	0.0079	6.2987	0.1861
GO:0019829	cation-transporting ATPase activity	5	231	1.5924	0.0188	4.8869	0.3142
GO:0042625	ATPase coupled ion transmembrane transporter activity	5	231	1.5924	0.0188	4.8869	0.3142
GO:0015294	solute:cation symporter activity	5	231	1.5924	0.0582	3.4150	0.6770
GO:0001046	core promoter sequence-specific DNA binding	5	231	1.5924	0.0647	3.2958	0.6804
GO:0031406	carboxylic acid binding	5	231	1.5924	0.0811	3.0478	0.7779
GO:0016616	oxidoreductase activity, acting on the CH-OH group of donors, NAD or NADP as acceptor	5	231	1.5924	0.0861	2.9836	0.7779
GO:0004559	alpha-mannosidase activity	4	231	1.2739	0.0017	16.1967	0.0681
GO:0015923	mannosidase activity	4	231	1.2739	0.0021	15.1169	0.0780
GO:0005504	fatty acid binding	4	231	1.2739	0.0042	11.9344	0.1313
GO:0015662	ATPase activity, coupled to transmembrane movement of ions, phosphorylative mechanism	4	231	1.2739	0.0127	8.0983	0.2470
GO:0005227	calcium activated cation channel activity	4	231	1.2739	0.0140	7.8191	0.2576
GO:0033293	monocarboxylic acid binding	4	231	1.2739	0.0214	6.6692	0.3421
GO:0005548	phospholipid transporter activity	4	231	1.2739	0.0249	6.2987	0.3889
GO:0022839	ion gated channel activity	4	231	1.2739	0.0328	5.6688	0.4788
GO:0005507	copper ion binding	4	231	1.2739	0.0546	4.6276	0.6572
GO:0016627	oxidoreductase activity, acting on the CH-CH group of donors	4	231	1.2739	0.0631	4.3606	0.6804
GO:0019199	transmembrane receptor protein kinase activity	4	231	1.2739	0.0850	3.8433	0.7779
GO:0015924	mannosyl-oligosaccharide mannosidase activity	3	231	0.9554	0.0080	21.2581	0.1861
GO:0004571	mannosyl-oligosaccharide 1,2-alpha-mannosidase activity	3	231	0.9554	0.0080	21.2581	0.1861
GO:0000064	L-ornithine transmembrane transporter activity	3	231	0.9554	0.0211	13.0819	0.3421
GO:0015269	calcium-activated potassium channel activity	3	231	0.9554	0.0391	9.4481	0.5360
GO:0016628	oxidoreductase activity, acting on the CH-CH group of donors, NAD or NADP as acceptor	3	231	0.9554	0.0432	8.9508	0.5695
GO:0045499	chemorepellent activity	3	231	0.9554	0.0658	7.0860	0.6804
GO:0015296	anion:cation symporter activity	3	231	0.9554	0.0862	6.0737	0.7779
GO:0008200	ion channel inhibitor activity	3	231	0.9554	0.0915	5.8643	0.8155
GO:0016248	channel inhibitor activity	3	231	0.9554	0.0970	5.6688	0.8529
GO:0043682	copper-transporting ATPase activity	2	231	0.6369	0.0348	56.6883	0.4875
GO:0004008	copper-exporting ATPase activity	2	231	0.6369	0.0348	56.6883	0.4875
GO:0004768	stearoyl-CoA 9-desaturase activity	2	231	0.6369	0.0518	37.7922	0.6343
GO:0016215	acyl-CoA desaturase activity	2	231	0.6369	0.0518	37.7922	0.6343
GO:0034185	apolipoprotein binding	2	231	0.6369	0.0684	28.3442	0.6804
GO:0016717	oxidoreductase activity, acting on paired donors, with oxidation of a pair of donors resulting in the reduction of molecular oxygen to two molecules of water	2	231	0.6369	0.0684	28.3442	0.6804
GO:0050544	arachidonic acid binding	2	231	0.6369	0.0684	28.3442	0.6804
GO:0050542	icosanoid binding	2	231	0.6369	0.0684	28.3442	0.6804
GO:0005375	copper ion transmembrane transporter activity	2	231	0.6369	0.0684	28.3442	0.6804
GO:0050543	icosatetraenoic acid binding	2	231	0.6369	0.0684	28.3442	0.6804
GO:0035252	UDP-xylosyltransferase activity	2	231	0.6369	0.0848	22.6753	0.7779
