# Supplementary material for: Changes in The Liver Transcriptome and Physiological Parameters of Japanese Black Steers During The Fattening Period
Source: Research Square preprint supplement (doi:10.21203/rs.3.rs-882318/v1), 2021-09-15
Supplement: Supplementary file 16 [file 9fcf70b4e5c2436f5bccc5e8.xlsx]

## Sheet: STable 17. Rumen fraction BMS
Supplementary Table S17
Variable	BMS group		BMS P-value	Period P-value	BMS x period P-value
	High	Low
pH	6.82±0.07	6.99±0.08	0.08	0.01	0.76
NH3(mg/dl)	13.18±1.63	13.02±1.49	0.90	<0.01	0.86
Total VFA(mmol/dl)	9.59±0.62	8.73±0.58	0.34	0.39	0.91
C2(Acetic)%	56.22±1.84	59.36±1.22	0.17	0.20	0.67
C3(Propionic)%	23.73±1.61	23.67±1.28	0.97	<0.01	0.89
C4(Butyric)%	15.01±1.09	13.36±0.93	0.25	0.18	0.42
C5(Other)%	5.04±0.99	3.61±0.56	0.19	0.06	0.55
A/P	2.50±0.19	2.61±0.18	0.58	<0.01	0.87
