# Supplementary material for: Changes in The Liver Transcriptome and Physiological Parameters of Japanese Black Steers During The Fattening Period
Source: Research Square preprint supplement (doi:10.21203/rs.3.rs-882318/v1), 2021-09-15
Supplement: Supplementary file 17 [file ce96e9f9d6aa7eb2a6a0d814.xlsx]

## Sheet: STable 6. DEGs BMS
Supplementary Table S6
Period	gene_ID	gene_name	baseMean	log2FoldChange
T1	ENSBTAG00000016729	KCNT2	82.593	2.45989
T2	ENSBTAG00000009097	FANCI	247.601	2.0146
	ENSBTAG00000014546	CLEC7A	75.3613	-1.89151
	ENSBTAG00000031376	BPIFA2C	34.827	8.50039
T3	ENSBTAG00000011922	PLEC	3929.69	1.61833
