# Supplementary material for: Changes in The Liver Transcriptome and Physiological Parameters of Japanese Black Steers During The Fattening Period
Source: Research Square preprint supplement (doi:10.21203/rs.3.rs-882318/v1), 2021-09-15
Supplement: Supplementary file 18 [file dad140fdbeca16d3f146e644.xlsx]

## Sheet: STable 2. Rumen fraction
Supplementary Table S2
Variable	Period			P-value
	T1	T2	T3
pH	6.95±0.04a	7.05±0.06a	6.64±0.06b	<0.01
NH3 (mg/dl)	13.37±0.58a	16.07±0.78a	8.64±0.86b	<0.01
Total VFA (mmol/dl)	9.36±0.34ab	8.13±0.42b	10.08±0.6a	0.0164
C2 (Acetic) %	61.42±0.96a	55.99±0.74b	59.57±0.91a	<0.01
C3 (Propionic) %	20.07±0.43b	25.39±0.71a	26.05±1.04a	<0.01
C4 (Butyric) %	14.24±0.71	13.84±0.46	11.97±0.8	0.0462
C5 (Other) %	4.27±0.52a	4.78±0.44a	2.41±0.12b	<0.01
C2/C3	3.08±0.08a	2.25±0.08b	2.38±0.12b	<0.01
