# Supplementary material for: Changes in The Liver Transcriptome and Physiological Parameters of Japanese Black Steers During The Fattening Period
Source: Research Square preprint supplement (doi:10.21203/rs.3.rs-882318/v1), 2021-09-15

Supplementary Figure S1

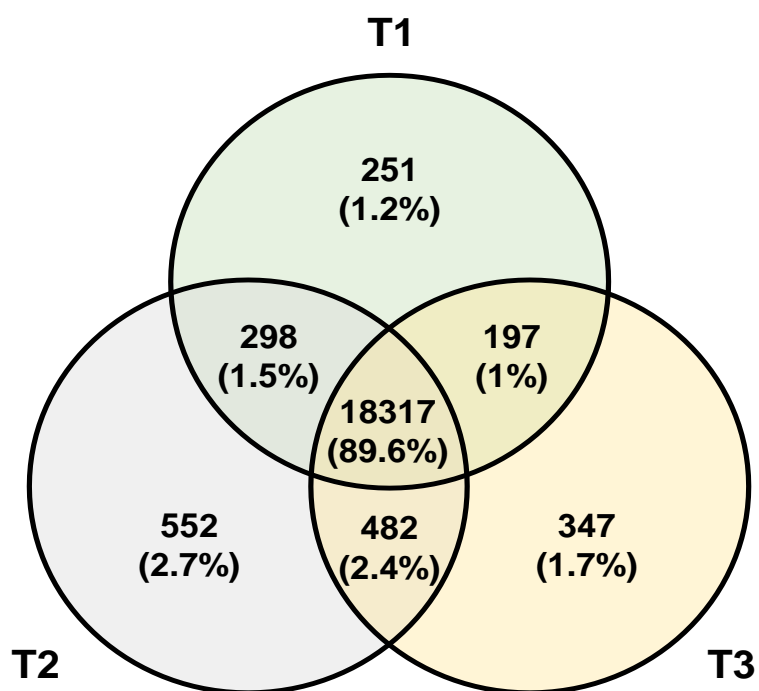

Supplement: Supplementary file [file 346176fb700d5e80a8816ddf.pdf]
